# Supplementary material
Source: PubMed Central journal article supplement (PMC6233098)
Supplement: pnas.1803410115.sapp.pdf [file pnas.1803410115.sapp.pdf]

1  
2 Supplementary Information for  
3

4 *Computational and Experimental Insights into the Circadian Effects of*  
5 *SIRT1*

6 Panagiota T. Foteinou, Anand Venkataraman, Lauren J. Francey, Ron C.  
7 Anafi, John B. Hogenesch and Francis J. Doyle III  
8 Francis J. Doyle III  
9 Email: frank\_doyle@seas.harvard.edu  
10

11  
12 **This PDF file includes:**

13  
14       Supplementary text  
15       Figs. S1 to S9  
16       Tables S1 to S7  
17       References for SI reference citations  
18  
19  
20  
21  
22  
23  
24  
25  
26  
27  
28  
29  
30

## Supplemental Experimental Procedures

**siRNA transfections and kinetic bioluminescence recording.** Cells were transfected using Lipofectamine RNAiMAX transfection reagent (Invitrogen) with 12pmol siRNA against all genes except *BMAL1*. Only 3pmol of the siRNA against *BMAL1* was transfected to prevent complete arrhythmicity. A negative control siRNA (AllStars Negative control siRNA; Qiagen) was used to ensure equal molar amounts of siRNA in all reactions. Two days post transfection, the cell-culture medium was changed to a recording medium [made up of phenol-red free DMEM (Sigma, D-2902), 4mM sodium bicarbonate (Sigma, S5761), 10mM HEPES buffer (Gibco, 15630-122), 1x PSG, 0.1mM luciferin (Promega) and 0.1 $\mu$ M Dexamethasone (Sigma)] and the plates were sealed shut using their own lids with sterile vacuum grease. Sealed plates were then placed into a LumiCycle luminometer (Actimetrics) and luminescence was measured for over 5 days. Alternatively, a linearly scaled down version of the above mentioned protocol was also used to record luminescence in a 96 well plate format using the Synergy2 BioTek microplate reader.

**Calculation of period length, amplitude and baseline.** Circadian period from the luminescence recordings was calculated using the WAVECLOCK package (1) on a Dell desktop PC running R for Windows version 2.7.0 (<http://www.R-project.org>) This wavelet-based assessment of period varies as a function of time and the median period, corresponding to the “total mode”, was used to describe the overall period. Waveforms with dominant non-circadian periods (outside the range of 20 – 28 hours) were considered arrhythmic. Circadian amplitude was determined by regression to a sinusoidal waveform with the previously established period using the `lm()` function in R. Baseline estimates used are the mean of all luminescence values recorded between day 1 and day 4 of the experiment.

**Isolation of RNA and gene expression assays.** Reverse transcription of 0.5-1  $\mu$ g of RNA was performed using qScript<sup>TM</sup> cDNA Synthesis Kit (Quanta Biosciences) and quantitative RT-PCR was performed using TaqMan gene expression assays (Applied Biosystems and IDT) and PerfeCTa<sup>®</sup> FastMix<sup>®</sup> II (Quanta Biosciences) as per the manufacturer’s instructions. Catalog numbers of the primers used in this manuscript are listed in **Table S3**.

### **Model derivation for the SIRT1-dependent deacetylation of BMAL1 and PER2 (model**

**A).** The following assumptions were made for the development of this model:

- i. In agreement with experimental observations (2), the canonical transcriptional/translational (PER-CRY/CLOCK-BMAL1) feedback loop is considered to be the primary generator of circadian oscillations. Complementary to this, the rhythmic regulation of the positive element, *BMAL1* transcription, by a second transcriptional feedback loop that involves the nuclear receptors REV-ERB and ROR, is not required for the generation of endogenous oscillations (3). Consequently, we assume constitutive expression of *BMAL1* gene expression.
- ii. For the purpose of simplicity, the mammalian homologs of period (*PER1*, *PER2* and *PER3*) and cryptochrome (*CRY1*, *CRY2*) genes are not explicitly modeled. Instead, they are represented by combined variables (*PER* and *CRY*) both at the mRNA and protein level.
- iii. At the mRNA level, SIRT1 is produced almost at constant levels (4) (similar to the constitutive levels of *CLOCK* expression in most tissues (5, 6)) and thereby both *CLOCK* and *SIRT1* dynamics are not described by explicit model variables. Instead, the model assumes NAD<sup>+</sup> levels represent SIRT1 deacetylase activity, whose oscillations are in phase. In the case of the constitutive *CLOCK* expression, the concentration of the nuclear CLOCK-BMAL1 complex is represented by the nuclear (active) BMAL1 and therefore such terms are used interchangeably.

- 82 iv. Although core loop components have many post-translational modifications, this  
83 study focuses on the role of acetylation in the circadian function (7). Of particular  
84 interest is how SIRT1 deacetylates nuclear BMAL1 and PER.  
85 v. Since SIRT1-mediated deacetylation promotes proteasomal degradation, the  
86 acetylated levels of nuclear proteins BMAL1 and PER represent the active entities.  
87 The PER-CRY complex is assumed to exist either in the acetylated (active) form or  
88 non-acetylated (inactive). Similarly, BMAL1 levels are considered as acetylated  
89 (active) BMAL1 and non-acetylated (inactive).

90 The mathematical formulation of model A, which is illustrated in **Fig. 1A**, consists of thirteen  
91 (13) ordinary differential equations (ODEs) and fifty-six (56) kinetic parameters. These state  
92 variables represent the kinetics of mRNA abundance of *PER* ( $M_{PER}$ ), *CRY* ( $M_{CRY}$ ) and *NAMPT*  
93 ( $M_{NAMPT}$ ) genes, as well as the corresponding protein concentrations in the cytosol (PER, CRY,  
94 NAMPT). Cytoplasmic and nuclear PER-CRY heterodimers are represented by PCC and PCN,  
95 respectively. The variable NAD describes cellular levels of  $NAD^+$ . Cytosolic and nuclear  
96 concentrations of BMAL1 protein are denoted by BC and BN. Further, the acetylated forms of  
97 the activator BMAL1 and the repressor complex PER-CRY are represented by  $BN_{ac}$  and  $PCN_{ac}$ ,  
98 respectively. The model dynamics are described by the following system of ODEs (S1.1) –  
99 (S1.4):

(a) mRNA dynamics of E-box genes (*PER*, *CRY* and *NAMPT*)

$$\frac{dM_i}{dt} = v_{0i} + \frac{v_{si} \cdot BN_{ac}^a}{K_{A_i}^a \cdot \left(1 + \left(\frac{PCN_{ac}}{R_i}\right)^r\right) + BN_{ac}^a} - \frac{v_{di} \cdot M_i}{K_{di} + M_i} - k_{dn} \cdot M_i, \quad i = \{PER, CRY, NAMPT\} \quad (S1.1)$$

(b) cytosolic proteins/complexes

$$\begin{aligned} \frac{dPER}{dt} &= k_{sp} \cdot M_{per} + k_{d,PC} \cdot PCC - k_{a,PC} \cdot PER \cdot CRY - \frac{v_{dP} \cdot PER}{K_{dP} + PER} - k_{dn} \cdot PER \\ \frac{dCRY}{dt} &= k_{sC} \cdot M_{Cry} + k_{d,PC} \cdot PCC - k_{a,PC} \cdot PER \cdot CRY - \frac{v_{dC} \cdot CRY}{K_{dC} + CRY} - k_{dn} \cdot CRY \\ \frac{dPCC}{dt} &= k_{a,PC} \cdot PER \cdot CRY - k_{d,PC} \cdot PCC - k_{im,PC} \cdot PCC + k_{ex,PC} \cdot PCN - \frac{v_{dPCC} \cdot PCC}{K_{dPCC} + PCC} - k_{dn} \cdot PCC_c \\ \frac{dBC}{dt} &= k_{sB} - k_{im,B} \cdot BC + k_{ex,B} \cdot BN - \frac{v_{dBC} \cdot BC}{K_{dBC} + BC} - k_{dn} \cdot BC \end{aligned} \quad (S1.2)$$

(c) nuclear proteins/complexes

$$\begin{aligned}
\frac{dPCN}{dt} &= k_{im,PC} \cdot PCC - k_{ex,PC} \cdot PCN - \frac{v_{PAC} \cdot PC_N}{K_{PAC} + PC_N} + \frac{v_{PDAC} \cdot NAD \cdot PCN_{ac}}{K_{PDAC} + PCN_{ac}} - \frac{v_{dPCN} \cdot PCN}{K_{dPCN} + PCN} - k_{dn} \cdot PCN \\
\frac{dPCN_{ac}}{dt} &= \frac{v_{PAC} \cdot PC_N}{K_{PAC} + PC_N} - \frac{v_{PDAC} \cdot NAD \cdot PCN_{ac}}{K_{PDAC} + PCN_{ac}} - k_{dn} \cdot PCN_{ac} \\
\frac{dBN}{dt} &= k_{im,B} \cdot BC - k_{ex,BC} \cdot BN - \frac{v_{BAC} \cdot BN}{K_{BAC} + BN} + \frac{v_{BDAC} \cdot NAD \cdot BN_{ac}}{K_{BDAC} + B_{Nac}} - \frac{v_{dBN} \cdot BN}{K_{dBN} + BN} - k_{dn} \cdot BN \\
\frac{dBN_{ac}}{dt} &= \frac{v_{BAC} \cdot BN}{K_{BAC} + BN} - \frac{v_{BDAC} \cdot NAD \cdot BN_{ac}}{K_{BDAC} + B_{Nac}} - k_{dn} \cdot BN_{ac}
\end{aligned} \tag{S1.3}$$

(d) NAMPT/NAD loop

$$\begin{aligned}
\frac{dNAMPT}{dt} &= k_{sN} \cdot M_{Nampt} - \frac{v_{dN} \cdot NAMPT}{K_{dN} + NAMPT} - k_{dn} \cdot NAMPT \\
\frac{dNAD}{dt} &= s_n \cdot NAMPT - \frac{v_{dNAD} \cdot NAD}{K_{dNAD} + NAD} - k_{dn} \cdot NAD
\end{aligned} \tag{S1.4}$$

100

101 As shown above, transcription is mathematically described by Hill equations (an expression  
102 commonly used in the literature (8, 9) characterized by five parameters representing the  
103 maximum velocity  $v_{si}$  ( $i = PER, CRY, NAMPT$ ), two DNA binding constants of an activator ( $K_{Ai}$ )  
104 and a repressor ( $R_i$ ,  $i = Per, Cry, Nampt$ ) and two Hill coefficients for activation ( $a$ ) and  
105 repression ( $r$ ). We further introduced basal synthesis rate for  $v_{0i}$  ( $i = PER, CRY, NAMPT$ ), which  
106 represents transcriptional activation from the constitutive promoter. Translation rate is  
107 proportional to mRNA concentration with the kinetic constant ( $k_{si}$ ,  $i = P, C, N$ ). The law of mass  
108 action describes association and dissociation of PER-CRY complexes, nuclear transportation, and  
109 reversible acetylations. Michaelis-Menten-type equations are employed to describe enzyme-  
110 mediated degradation processes. Nonspecific degradation processes are also incorporated and are  
111 proportional to each variable with the kinetic constant  $k_{dn}$ . Taken together, this model integrates  
112 the classical PER-CRY transcriptional feedback loop with the circadian NAMPT/NAD<sup>+</sup>  
113 enzymatic loop.

114

115 **Equation (S1).** Let us consider an ordinary differential equation system (ODE)

$$116 \quad \frac{d\mathbf{x}}{dt} = F(\mathbf{x}, \mathbf{p}), \quad \mathbf{x} \in \mathbb{R}^n, \quad \mathbf{p} \in \mathbb{R}^m$$

117 where  $\mathbf{x}$  denotes the vector of state variables and  $\mathbf{p}$  the vector of parameters. Suppose that this  
118 system has a stable periodic solution with period ( $T$ ). Using the scaling

$$119 \quad \tau_0 = \frac{t}{T}$$

120 the system reads as follows:

$$121 \quad \frac{d\mathbf{x}}{d\tau_0} = TF(\mathbf{x}, \mathbf{p}), \quad \mathbf{x} \in \mathbb{R}^n, \quad \mathbf{p} \in \mathbb{R}^m$$

122 with  $\tau_0 \in (0,1)$ . In order for the system to yield a period close to naturally occurring in  
123 continuous darkness ( $\tau_{dd}$ ), the system is transformed as

124

$$\frac{d\mathbf{x}}{d\tau} = \frac{T}{\tau_{dd}} \mathbf{F}(\mathbf{x}, \mathbf{p}), \quad \mathbf{x} \in \mathbb{R}^n, \quad \mathbf{p} \in \mathbb{R}^m$$

125 with  $\tau \in (0, \tau_{dd})$ ; hence all rate parameters are multiplied by the scaling factor  $(T/\tau_{dd})$ . In this  
126 study the cell autonomous period ( $\tau_{dd}$ ) is considered to be 23.7h which is the average period of an  
127 individual circadian oscillator ( $23.7 \pm 1.2$  h) (10).

128 **Self-sustained oscillations and relevant phases.** We tested the ability of our proposed circadian  
129 oscillator model to reproduce experimentally observed sustained oscillations. Using the parameter  
130 values as shown in **Table S1** our first modeling effort (model A) can reproduce cell autonomous  
131 oscillations with relevant phase relations as illustrated in **Table S5**. Specifically, for both  
132 parameter sets (H1 and H2) the mRNA of co-regulated E-box genes (PER, CRY, NAMPT) peaks  
133 early during the subjective night while the circadian levels of the protein NAMPT and NAD  
134 cofactor peak later in the middle of the subjective night. Such phase delay is related to the  
135 upregulation of metabolic processes during the fasting period. Further, the model reproduces a 4-  
136 hour phase relationship between PER mRNA and PER protein, which lies within the  
137 experimental range of a 4-hour to 8-hour delay (5). In this model, the rhythmic levels of PER,  
138 rather than CRY, are critical for circadian oscillations which are consistent with experimental  
139 findings from these studies (11, 12). Meanwhile the simulated circadian oscillations of acetylated  
140 BMAL1 (BMAL1<sup>AC</sup>) are almost antiphasic to the variation levels of NAD regulator. Importantly,  
141 Nakahata et al. (4) found in both synchronized fibroblasts and liver tissue that the peak phase of  
142 SIRT1 deacetylase activity is consistent with the low levels of cyclic acetylation of histone H3  
143 and non-histone substrates (i.e. BMAL1). In regard to phase relation between SIRT1 (or NAD)  
144 activity and acetylated PER (PER<sup>AC</sup>-CRY), it is noteworthy that the model predicts an in-phase  
145 relationship. This is captured for parameter set H2 where SIRT1 regulates the dynamics of  
146 PER<sup>AC</sup>-CRY (negative clock component). As the active repressor, PER<sup>AC</sup>-CRY is expected to  
147 peak late in the evening, which is experimentally shown in (13) and also reproduced by the  
148 model. For the parameter set H1, an in-phase relationship between the peak phases of SIRT1 and  
149 PER<sup>AC</sup>-CRY is not necessary. This explains the phase difference (advance) simulated for NAD  
150 when parameter set H1 is compared with set H2 (**Table S5**).

151

#### 152 **Model derivation for the SIRT1-dependent regulation of PGC1 $\alpha$ , BMAL1 and PER2**

153 **(model B).** The following assumptions were made for the development of this model:

- 154 i. All members of the ROR ( $\alpha$ ,  $\beta$  and  $\gamma$ ) and REV-ERB subfamilies ( $\alpha$  and  $\beta$ ) are not  
155 explicitly modeled. Instead, they are represented by combined variables (ROR and REV-  
156 ERB) both at the mRNA and protein level.
- 157 ii. At the mRNA level, the transcription of *ROR* genes is assumed to be regulated not only by  
158 the core PER/CRY loop (E-box regulation) but also directly by the ROR/REV-ERB loop  
159 (RORE mediated regulation). This assumption is in agreement with the experimental  
160 findings of Liu et al. (3), which indicate that *ROR* harbors a functional RORE.
- 161 iii. For the sake of simplicity, the model does not distinguish between rhythmic *PGC1 $\alpha$*   
162 expression and the corresponding protein. Instead, the variable PGC1 $\alpha$  is assumed to  
163 represent the rhythmic activity of PGC1 $\alpha$  that depends upon NAD<sup>+</sup>-dependent  
164 deacetylation by SIRT1. Quantitatively, the induction of PGC1 $\alpha$  by SIRT1 is described by  
165 a Michaelis-Menten type equation while a basal rate and non-specific degradation term are  
166 used to describe constitutive activation.
- 167 iv. The stimulatory activity of the protein ROR at the ROR-binding sites (RORE) is exerted  
168 via its synergistic action with the transcriptional coactivator PGC1 $\alpha$  (14), a transcriptional  
169 regulator highly responsive to nutrient signals. This interaction results in the formation of  
170 the complex (ROR<sup>\*</sup>) which represents the active ROR protein.
- 171 v. With regard to the core PER/CRY loop, the model distinguishes two homologs of the PER  
172 subfamily (*PER1* and *PER2* genes) and SIRT1 regulates the acetylation level of PER2. The  
173 sum of the PER1/CRY complex and the active (acetylated) PER2/CRY (denoted P1C and  
174 P2C<sub>ac</sub>, respectively) represent the total (active) PER/CRY repressor.
- 175 vi. For the purpose of simplicity, we only consider reversible entry of the cytosolic protein  
176 BMAL1 into the nucleus (denoted BC and BN, respectively). Nuclear BMAL1 undergoes  
177 reversible acetylation regulated by SIRT1, consistent with model A.

178  
179  
180  
181  
182  
183  
184  
185

The model described in this section explicitly considers the rhythmic regulation of *BMAL1* transcription by the auxiliary ROR/REV-ERB feedback loop (model B). Within this loop, the clock genes *ROR* ( $M_{ROR}$ ) and *NR1D1/2* ( $M_{REV}$ ) are transcribed and translated into the corresponding proteins ROR and REV-ERB (REV), which regulate *BMAL1* expression ( $M_B$ ) by competing at the BMAL1 promoter as activator and repressor, respectively. The dynamics of this model illustrated in **Fig. 2** are described by the following system of ODEs (S1.5) – (S1.9):

(a) mRNA dynamics of E-box and RORE genes

$$\frac{dM_i}{dt} = v_{0i} + \frac{v_{si} \cdot BN_{ac}^a}{K_{A_i}^a \cdot \left(1 + \left(\frac{PIC}{R_i} + \frac{P2C_{ac}}{R_i}\right)^r\right) + BN_{ac}^a} - \frac{v_{di} \cdot M_i}{K_{di} + M_i} - k_{dn} \cdot M_i, \quad (S1.5)$$

$$i = \{PER1, PER2, CRY, REV, NAMPT\}$$

$$\frac{dM_B}{dt} = v_{0B} + \frac{v_{sB} \cdot ROR^{*b}}{K_{AB}^b \left(1 + \left(\frac{REV}{R_B}\right)^c\right) + ROR^{*b}} - \frac{v_{dB} \cdot M_B}{K_{dB} + M_B} - k_{dn} \cdot M_B$$

$$\begin{aligned} \frac{dM_{Ror}}{dt} = & v_{0Ror} + \frac{v_{s1Ror} \cdot BN_{ac}^a}{K_{A1ror}^a \cdot \left(1 + \left(\frac{PIC}{R_{1Ror}} + \frac{P2C_{ac}}{R_{1Ror}}\right)^r\right) + BN_{ac}^a} + \frac{v_{s2Ror} \cdot ROR^{*b}}{K_{A2ror}^b \left(1 + \left(\frac{REV}{R_{2Ror}}\right)^c\right) + ROR^{*b}} \\ & - \frac{v_{dRor} \cdot M_{Ror}}{K_{dRor} + M_{Ror}} - k_{dn} \cdot M_{Ror} \end{aligned} \quad (S1.6)$$

(b) Proteins/complexes of PER1/CRY loop

$$\frac{dPER1}{dt} = k_{sP} \cdot M_{Per1} + k_{d,PIC} \cdot PIC - k_{a,PIC} \cdot PER1 \cdot CRY - \frac{v_{dP1} \cdot PER1}{K_{dp} + PER1} - k_{dn} \cdot PER1$$

$$\frac{dCRY}{dt} = k_{sC} \cdot M_{Cry} + k_{d,PIC} \cdot PIC - k_{a,PIC} \cdot PER1 \cdot CRY - \frac{v_{dC} \cdot CRY}{K_{dc} + CRY} - k_{dn} \cdot CRY$$

$$\frac{dPIC}{dt} = k_{a,PIC} \cdot PER1 \cdot CRY - k_{d,PIC} \cdot PIC - \frac{v_{dPIC} \cdot PIC}{K_{dPIC} + PIC} - k_{dn} \cdot PIC$$

(c) Proteins/complexes of PER2/CRY loop

$$\begin{aligned}
\frac{dPER2}{dt} &= k_{sp} \cdot M_{Per1} + k_{d,P2C} \cdot P2C - k_{a,P2C} \cdot PER2 \cdot CRY - \frac{v_{dP2} \cdot PER2}{K_{dP} + PER2} - k_{dn} \cdot PER2 \\
\frac{dCRY}{dt} &= k_{sC} \cdot M_{Cry} + k_{d,P1C} \cdot P1C - k_{a,P1C} \cdot PER1 \cdot CRY + k_{d,P2C} \cdot P2C - k_{a,P2C} \cdot PER2 \cdot CRY \\
&\quad - \frac{v_{dC} \cdot CRY}{K_{dC} + CRY} - k_{dn} \cdot CRY \\
\frac{dP2C}{dt} &= k_{a,P2C} \cdot PER2 \cdot CRY - k_{d,P2C} \cdot P2C - \frac{v_{PAC} \cdot P2C}{K_{PAC} + P2C} + \frac{v_{PDAC} \cdot NAD \cdot P2C_{ac}}{K_{PDAC} + P2C_{ac}} \\
&\quad - \frac{v_{dP1C} \cdot P2C}{K_{dP1C} + P2C} - k_{dn} \cdot P2C \\
\frac{dP2C_{ac}}{dt} &= \frac{v_{PAC} \cdot P2C}{K_{PAC} + P2C} - \frac{v_{PDAC} \cdot NAD \cdot P2C_{ac}}{K_{PDAC} + P2C_{ac}} - k_{dn} \cdot P2C_{ac}
\end{aligned} \tag{S1.6}$$

(d) Cytosolic/nuclear BMAL1

$$\begin{aligned}
\frac{dBC}{dt} &= k_{sB} \cdot M_B - k_{im,B} \cdot BC + k_{ex,B} \cdot BN - \frac{v_{dBC} \cdot BC}{K_{dBC} + BC} - k_{dn} \cdot BC \\
\frac{dBN}{dt} &= k_{im,B} \cdot BC - k_{ex,BC} \cdot BN - \frac{v_{BAC} \cdot BN}{K_{BAC} + BN} + \frac{v_{BDAC} \cdot NAD \cdot BN_{ac}}{K_{BDAC} + B_{Nac}} - \frac{v_{dBN} \cdot BN}{K_{dBN} + BN} - k_{dn} \cdot BN \\
\frac{dBN_{ac}}{dt} &= \frac{v_{BAC} \cdot BN}{K_{BAC} + BN} - \frac{v_{BDAC} \cdot NAD \cdot BN_{ac}}{K_{BDAC} + B_{Nac}} - k_{dn} \cdot BN_{ac}
\end{aligned} \tag{S1.7}$$

(e) Proteins/complexes of ROR/REV-ERB loop

$$\begin{aligned}
\frac{dREV}{dt} &= k_{sREV} \cdot M_{Rev} - \frac{v_{dREV} \cdot REV}{K_{dREV} + REV} - k_{dn} \cdot REV \\
\frac{dROR}{dt} &= k_{sROR} \cdot M_{Ror} - \frac{v_{dROR} \cdot ROR}{K_{dROR} + ROR} - k_{a,RP} \cdot PGC1\alpha \cdot ROR + k_{d,RP} \cdot ROR^* - k_{dn} \cdot ROR \\
\frac{dPGC1\alpha}{dt} &= v_{0pgc} + \frac{v_{spgc} \cdot NAD}{K_{Apgc} + NAD} - k_{a,RP} \cdot PGC1\alpha \cdot ROR + k_{d,RP} \cdot ROR^* \\
&\quad - \frac{v_{dpgc} \cdot PGC1\alpha}{K_{dpgc} + PGC1\alpha} - k_{dn} \cdot PGC1\alpha \\
\frac{dROR^*}{dt} &= k_{a,RP} \cdot ROR \cdot PGC1\alpha - k_{d,RP} \cdot ROR^*
\end{aligned} \tag{S1.8}$$

(f) NAMPT/NAD loop

$$\begin{aligned}
\frac{dNAMPT}{dt} &= k_{sN} \cdot M_{Nampt} - \frac{v_{dN} \cdot NAMPT}{K_{dN} + NAMPT} - k_{dn} \cdot NAMPT \\
\frac{dNAD}{dt} &= s_n \cdot NAMPT - \frac{v_{dNAD} \cdot NAD}{K_{dNAD} + NAD} - k_{dn} \cdot NAD
\end{aligned} \tag{S1.9}$$

186 As shown in equations (S1.5) – (S1.9) this mathematical model is characterized by 19 ODEs and  
187 92 kinetic parameters, which are estimated using the same evolutionary search algorithm as  
188 previously described . Additional constraints set by relevant experimental observations are



189 considered in the cost function and summarized in **Table S4**. Among these, a major constraint is  
190 related to the dominant effects of REV-ERB within the ROR/REV-ERB loop. Specifically, the  
191 model should allow the simulation of increased baseline of *BMALI* oscillations in the loss-of-  
192 function mutation for *BMALI* as we have previously shown in the study (15). Further data are  
193 related to the downregulatory effects of *SIRT1* null mutation (*SIRT1*<sup>-/-</sup>) on *BMALI* expression as  
194 previously shown (13). The proposed model is calibrated using published data and validated  
195 using additional RNA interference technology (RNAi) knockdown experiments.

196 **Estimation of model parameters.** To estimate the unknown parameters, an evolutionary  
197 algorithm was performed minimizing a particular cost function using the MATLAB Distributed  
198 Computing Toolbox. The cost function is defined as the discrepancy (*error*) between the output  
199 of the model and the data that comes from experiments. Experimental data (i.e. phases) from  
200 canonical clock genes and metabolites (4, 6, 16-20) were used. Appropriate parameters are  
201 chosen as those that satisfy these criteria (also in **Table S4**): (i) self-sustained oscillations are due  
202 to PER-CRY negative feedback loop; (ii) *SIRT1* loss does not result in arrhythmicity (in this  
203 model, *SIRT1*<sup>-/-</sup> is equivalent to NAD<sup>-/-</sup>); (iii) simulation of either increased or decreased  
204 amplitude due to lack of enzymatic (NAD) activity as shown by Nakahata et al. (4) and Asher et  
205 al. (13), respectively. This estimation algorithm allows therefore for the generation of two  
206 independent parameter sets (referred to here as sets H1 and H2). Set H1 refers to the parameters  
207 for which the model simulates increased amplitude phenotype in response to lack of *SIRT1*  
208 (*SIRT1*<sup>-/-</sup>), while set H2 refers to the parameters used in the model to simulate reduced amplitude  
209 response. To generate these two parameter sets, we used an “unsupervised” parameter estimation  
210 algorithm that utilizes a diverse set of experimental data to calibrate the model; without  
211 supervising for the identification of a few parameter combinations that dictate model behavior  
212 across the two paradoxical *SIRT1*<sup>-/-</sup> phenotypes. Given the prevalence of sloppiness – an  
213 apparently universal property of systems biology models (21) – many parameters are expected to  
214 vary across the two sets H1 and H2. Briefly, sloppiness suggests that collective fits to even large  
215 amounts of ideal (experimental) data often leave many parameters poorly constrained.  
216 Consequently, the model behavior depends on only a few (“stiff”) parameter combinations.  
217 Further, the prevalence of sloppiness highlights the power of collective fits and suggests focusing  
218 on predictions rather than on parameters. Although a “supervised” approach could plausibly  
219 identify fewer more critical parameter combinations, we believe that either approach would  
220 ultimately yield similar predictions. Once a certain range of parameter values is captured for  
221 which the model produces periodic solutions and relevant phases, its period is scaled using  
222 **Equation S1** (see supplemental experimental procedures) so as to yield a typical period of an  
223 individual (circadian) oscillator close to 24h (i.e. 23.7h) (22, 23).

224 **Design of *in silico* knockdown experiments.** The performance of the extended circadian-  
225 enzymatic model (model B) is assessed through its ability to predict experimentally observed  
226 phenotypes of various genetic perturbations of circadian clock components. We have devised  
227 three levels of *in silico* predictions that are consistent with the RNAi validation experiments  
228 including: (i) circadian effects of *SIRT1* knockdown on circadian oscillations following *BMALI*  
229 knockdown; (ii) circadian effects of *SIRT1* knockdown when expression of *CLOCK* is inhibited,  
230 and (iii) circadian effects of *SIRT1* knockdown when *PER2*, *PGC1 $\alpha$*  or *ROR* is knocked down. In  
231 order to simulate the effect of a knockdown experiment, the effect of interference could be  
232 simulated either at the RNA level by increasing the RNA degradation rate or at the protein level  
233 by reducing the translation rate. Both methods give similar results except for the *BMALI*  
234 knockdown experiment. Increasing the RNA degradation rate of *BMALI* enables the model to  
235 robustly predict reduced *BMALI* expression, consistent with the experimentally observed  
236 reduction of endogenous mRNA. Reducing the translation rate enables the model to simulate  
237 increased baseline of *BMALI* mRNA. While this is consistent with the effect of *BMALI*  
238 knockdown on *BMALI* luciferase oscillations, it does not correlate with the cognate mRNA. We

239 simulated *BMAL1* knockdown by reducing the translation rate since the measured *BMAL1*  
240 luciferase oscillations represent the output of the *BMAL1* promoter (mathematically described by  
241 the variable  $M_B$ ). Reducing the kinetic parameters of acetylation ( $v_{BAC}$ ) and synthesis rate ( $s_n$ ) of  
242 *BMAL1* and *NAD* respectively simulates the effect of *CLOCK* and *SIRT1* knockdown. Note that  
243 both *CLOCK* and *SIRT1* are implicitly considered in this model (constitutive expression) and  
244 therefore their knockdowns could not be tested *in silico* at the RNA level.  
245  
246

247  
248

## Supplemental Figures

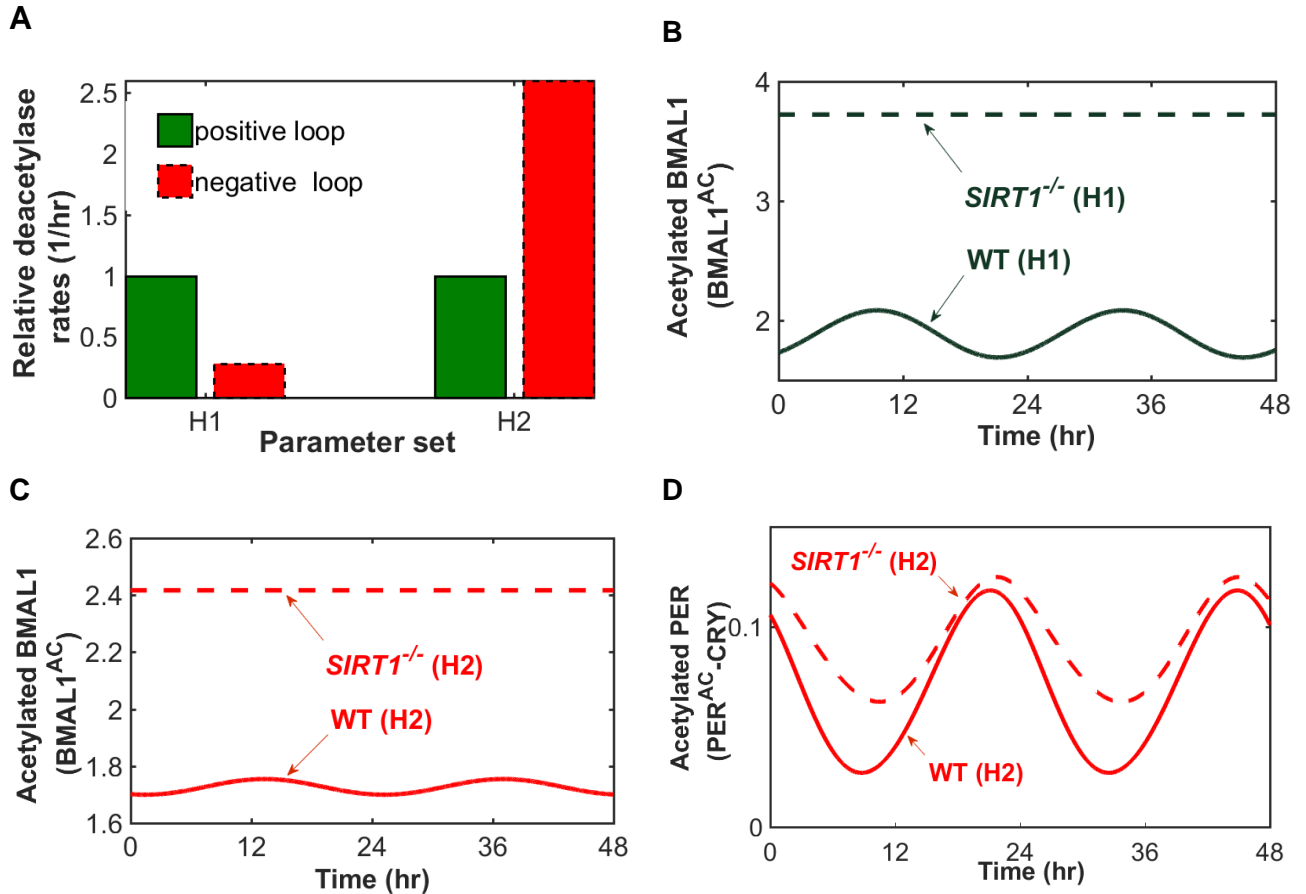

249  
250  
251  
252  
253  
254  
255  
256  
257  
258  
259  
260  
261  
262  
263  
264  
265

**Fig. S1. Related to Figure 1.** (A) Deacetylase rates in the negative loop relative to the positive loop. When H1 mechanism prevails, the rate of SIRT1 deacetylase in the negative loop ( $v_{PDAC}/K_{PDAC}$ ) is much smaller than in the positive loop ( $v_{BDAC}/K_{BDAC}$ ) while the opposite occurs when H2 mechanism dominates. For each parameter set (H1 and H2) the deacetylase rates are relative to the rate in the positive loop. (B, C) Rhythmic versus constitutive acetylation of BMAL1. Solid lines represent the wildtype (WT) dynamics of acetylated BMAL1 (BMAL1<sup>AC</sup>) simulated using the parameter values of Table S1 (set H1). Dashed lines correspond to the *SIRT1* null mutant (*SIRT1*<sup>-/-</sup>). (D) Dynamics of acetylated repressor (PER<sup>AC</sup>-CRY) under control wildtype (WT) and *SIRT1*<sup>-/-</sup> conditions. The model simulates elevated acetylation levels of PER protein in the *SIRT1*<sup>-/-</sup> mutant as reported by Asher et al (13) using the H2 parameter set.

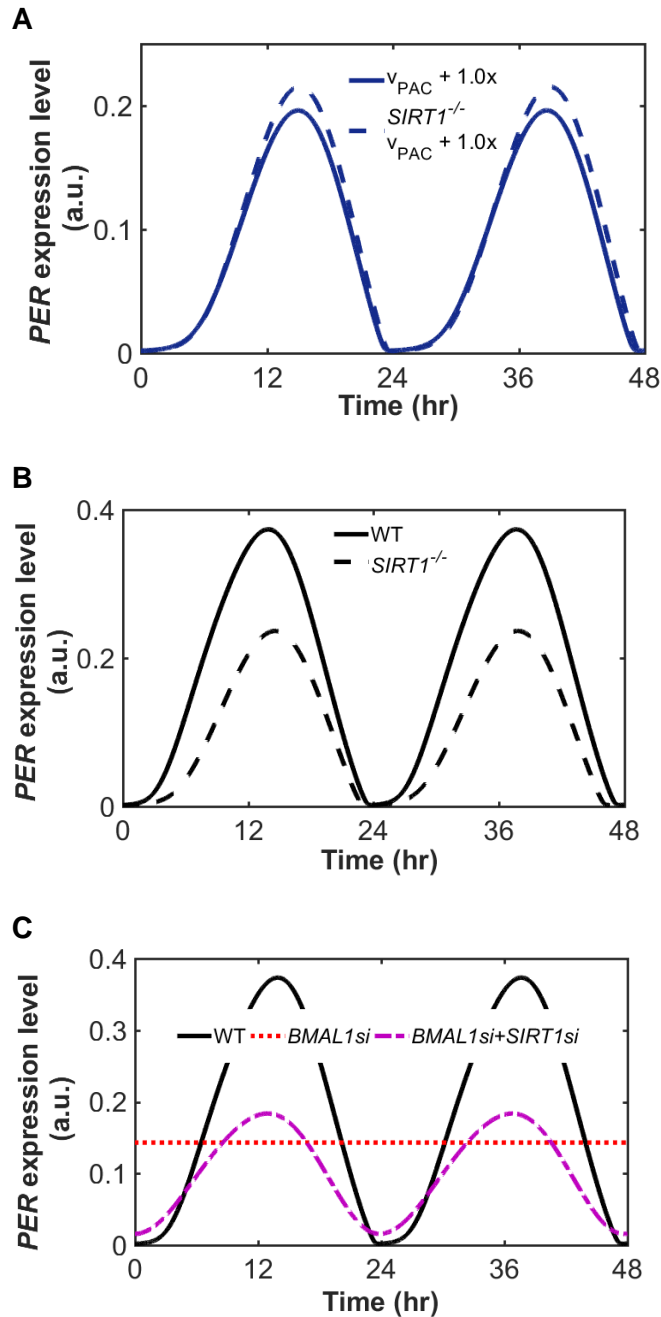

266 **Fig. S2. Related to Figure 1.** (A, B) Variation in the acetylation rate of repressor leads to dynamic changes  
 267 in the amplitude response due to lack of *SIRT1*. Solid lines represent wildtype (WT) dynamics simulated  
 268 using parameter set H2, while dashed line is simulated using the same parameter values except for the  
 269 parameter  $v_{PAC}$  which is increased by 100% ( $v_{PAC} + 1.0x$ ). Under this single parametric perturbation, the  
 270 amplitude in the absence of *SIRT1* switches from a reduction (black dashed line, B panel) to an increase  
 271 (blue dashed line, A panel). (C) Variations of the strength of the positive and enzymatic feedback lead to a  
 272 rescue of arrhythmicity. Simulated loss of oscillations (red dotted line) caused by a variation of the positive  
 273 feedback (*BMAL1si*) are rescued by loss-of-function mutation for *SIRT1* (magenta dashed line). The  
 274 positive feedback is varied by a 55% decrease in the synthesis rate of *BMAL1* activator while the synthesis  
 275 rate ( $s_n$ ) of NAD which in this model represents *SIRT1* is reduced by 50%. Black solid line represent  
 276 control wildtype (WT) dynamics of *PER* expression simulated using parameter set H2. Similar responses

277 are also simulated using parameter set H1. For reasons of clarity, the simulated *PER* expression in response  
278 to *SIRT1si* is omitted (similar to the dynamics illustrated in Figure 1B).

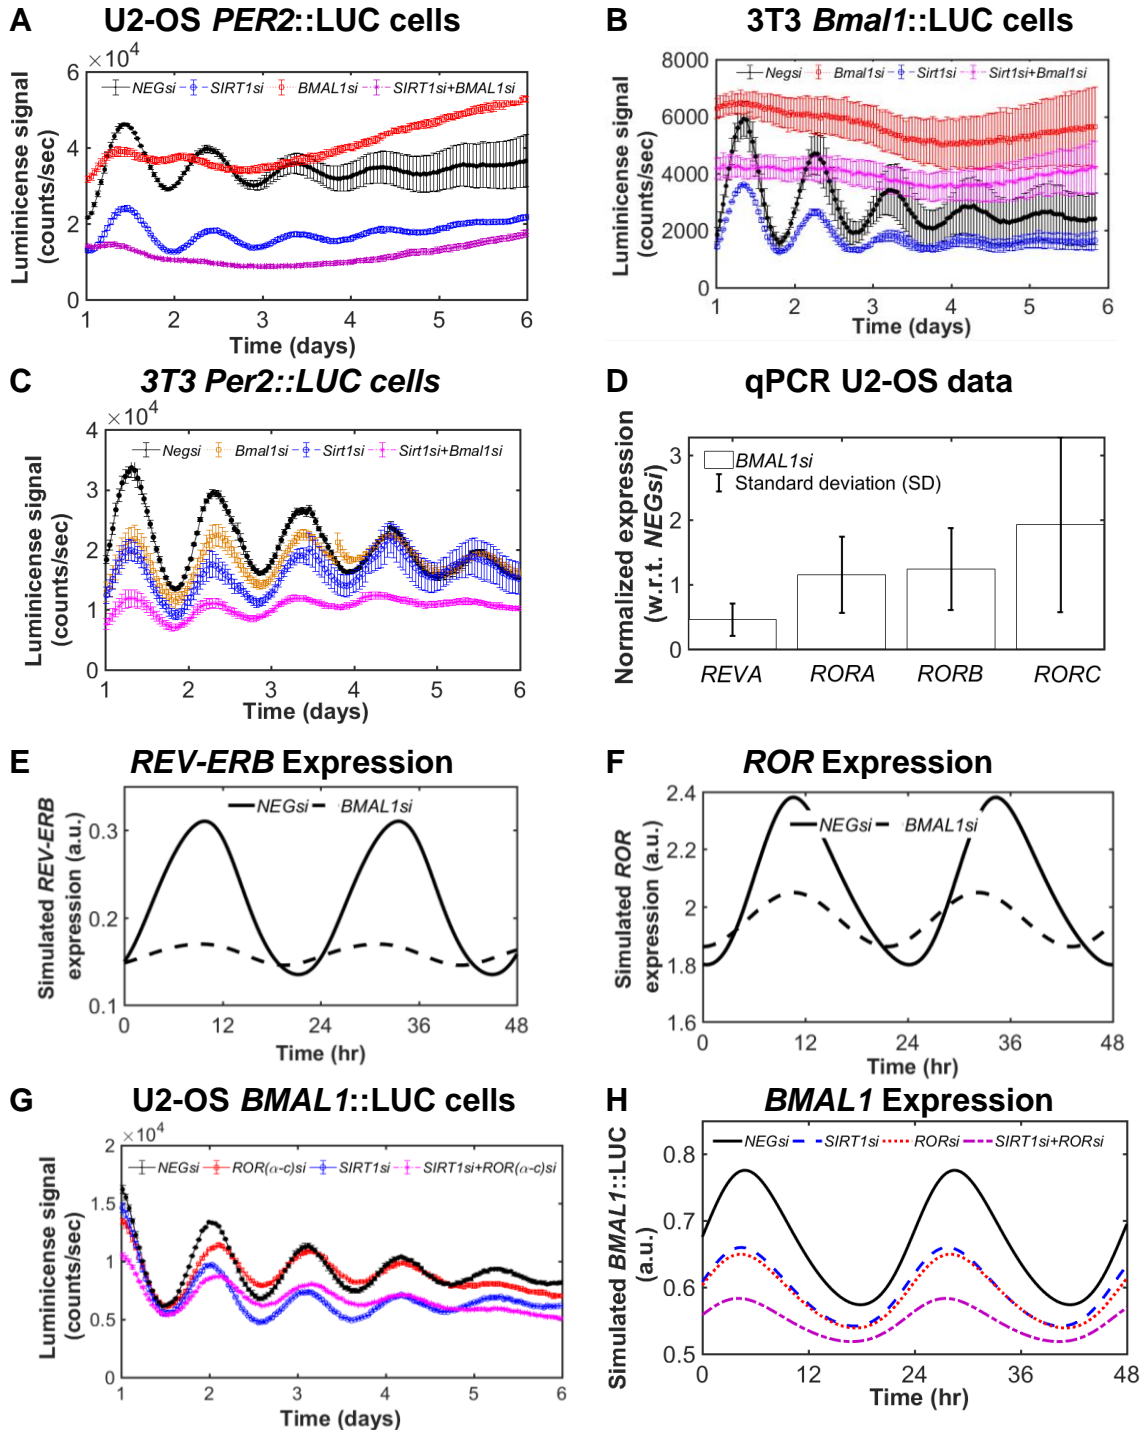

279 **Fig. S3. Related to Figure 2.** (A) Luciferase counts measured in U2-OS *PER2::LUC* cells transfected with  
 280 siRNAs targeting *BMAL1*, *SIRT1* or both. (B, C) Luciferase counts measured in 3T3 *Bmal1::LUC* and  
 281 *Per2::LUC* cell-lines respectively, following transfections with siRNAs targeting *Sirt1*, *Bmal1* or both.  
 282 Data are represented as mean  $\pm$  SEM. (D) Experimentally measured mRNA expression levels of *NR1D1*  
 283 (*REVA*) and all three isoforms of *ROR* under *BMAL1si* condition normalized to control (*NEGsi*). Data are  
 284 represented as mean  $\pm$  SD. (E, F) Simulated expression levels of *REV-ERB* and *ROR* under control (solid  
 285 lines) and *BMAL1si* conditions (dashed lines) while considering that *SIRT1* can deacetylate *PER2*, *BMAL1*  
 286 and *PGC1 $\alpha$* . (G) Effects of *SIRT1* knockdown (*SIRT1si*) on *BMAL1::LUC* when all *ROR* isoforms are  
 287 knocked down (*ROR( $\alpha$ -c)si*). (H) Simulation results of *ROR* and *SIRT1* knockdown on *BMAL1* expression.

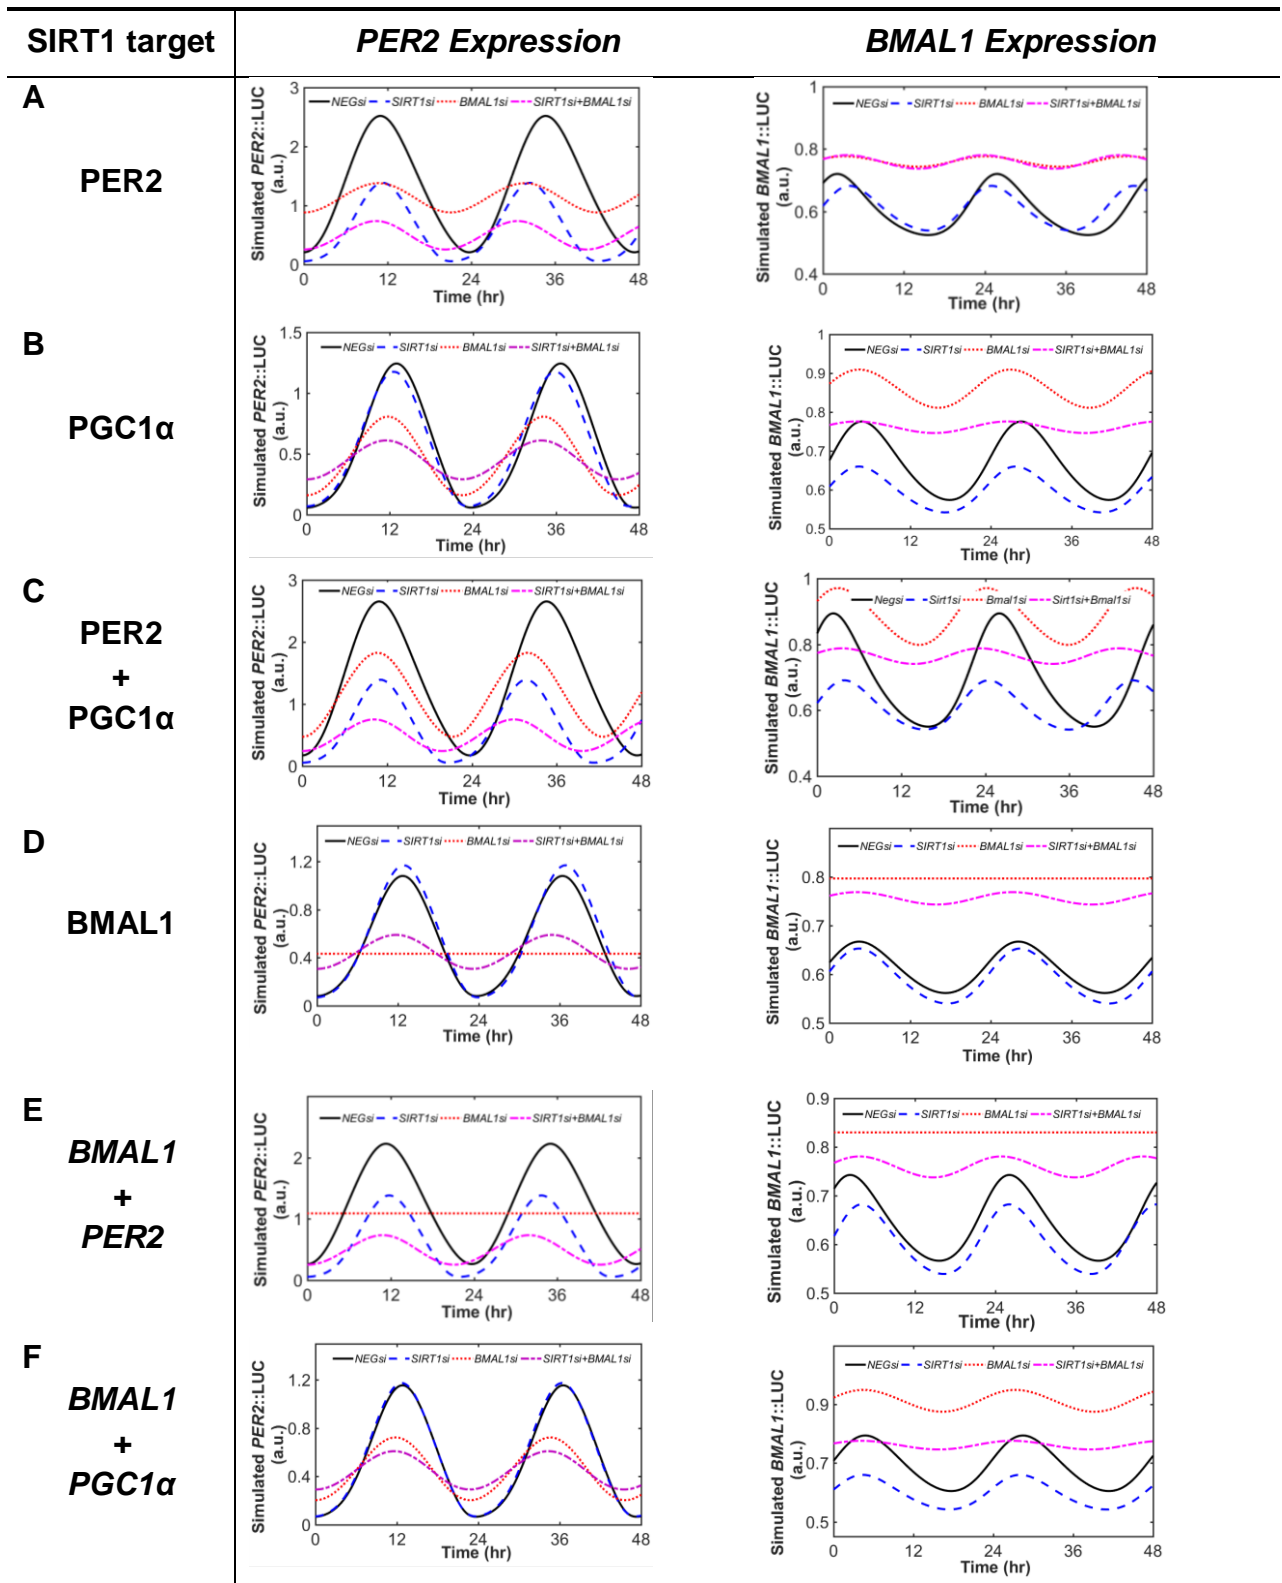

288 **Fig. S4. Related to Figure 2.** Simulation of the circadian effects of *SIRT1* and *BMAL1* knockdown on  
 289 *PER2*/*BMAL1* oscillations when *SIRT1* regulates (A) only *PER2*, (B) only *PGC1α*, (C) both *PER2* and  
 290 *PGC1α*, (D) only *BMAL1*, (E) both *BMAL1* and *PER2*, or (F) both *BMAL1* and *PGC1α*.

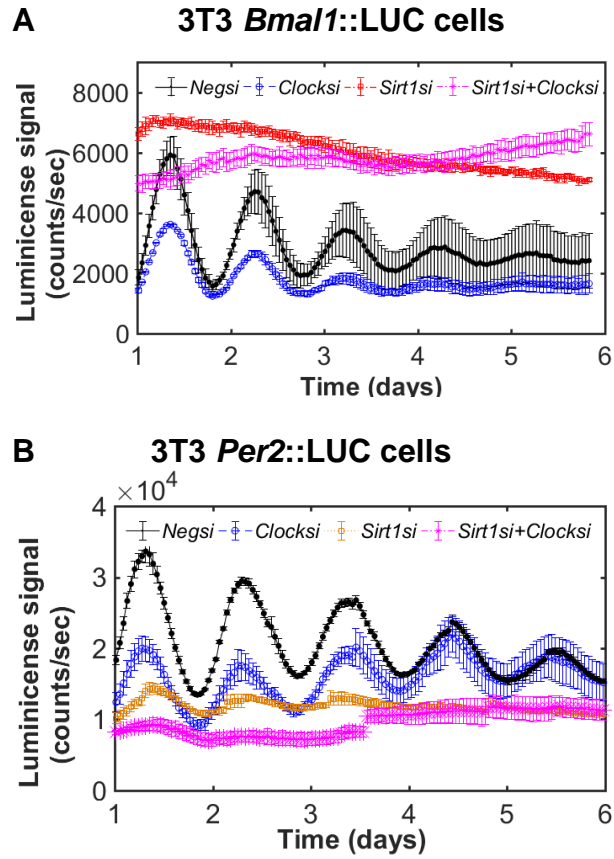

291 **Fig. S5. Related to Figure 3.** *SIRT1/CLOCK* knockdown effects on oscillations of the 3T3 cells in (A)  
 292 *Bmal1*::LUC reporter lines and (B) *Per2*::LUC reporter lines. Data are represented as mean  $\pm$  SEM.  
 293  
 294  
 295  
 296  
 297



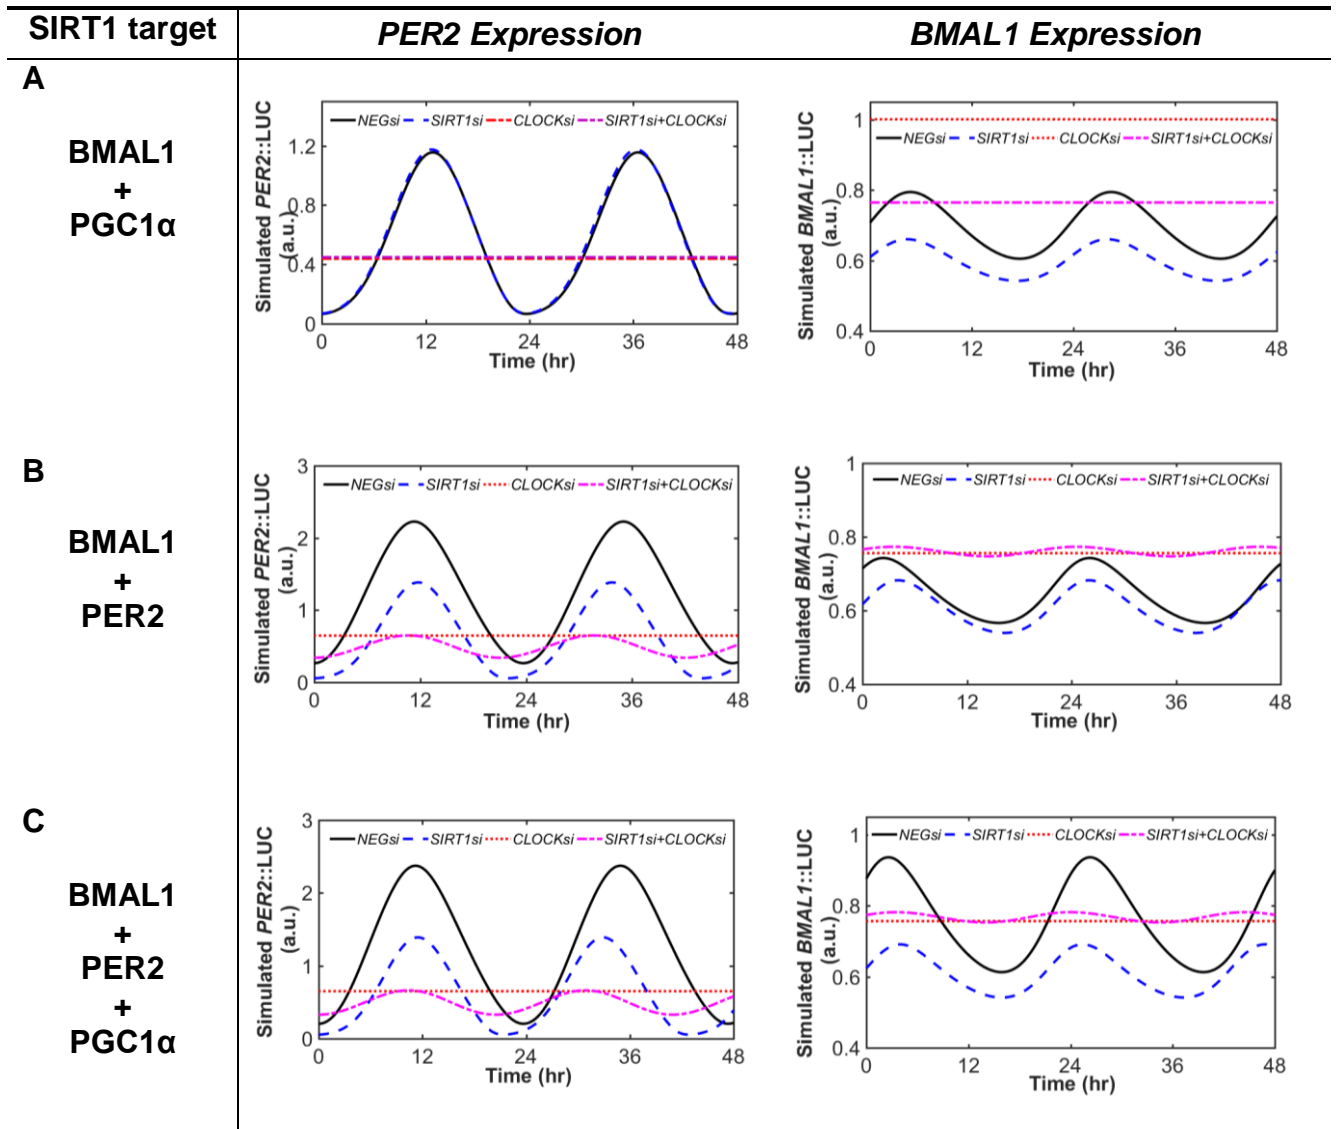

299 **Fig. S6. Related to Figure 4.** Simulation results of the circadian effects of *SIRT1* and *CLOCK* knockdown  
300 on *BMAL1::LUC* and *PER2::LUC* oscillations. Simulations are performed when considering *SIRT1*  
301 regulates (A) *BMAL1* and *PGC1 $\alpha$* , (B) *BMAL1* and *PER2*, and (C) *BMAL1*, *PER2* and *PGC1 $\alpha$* .  
302  
303

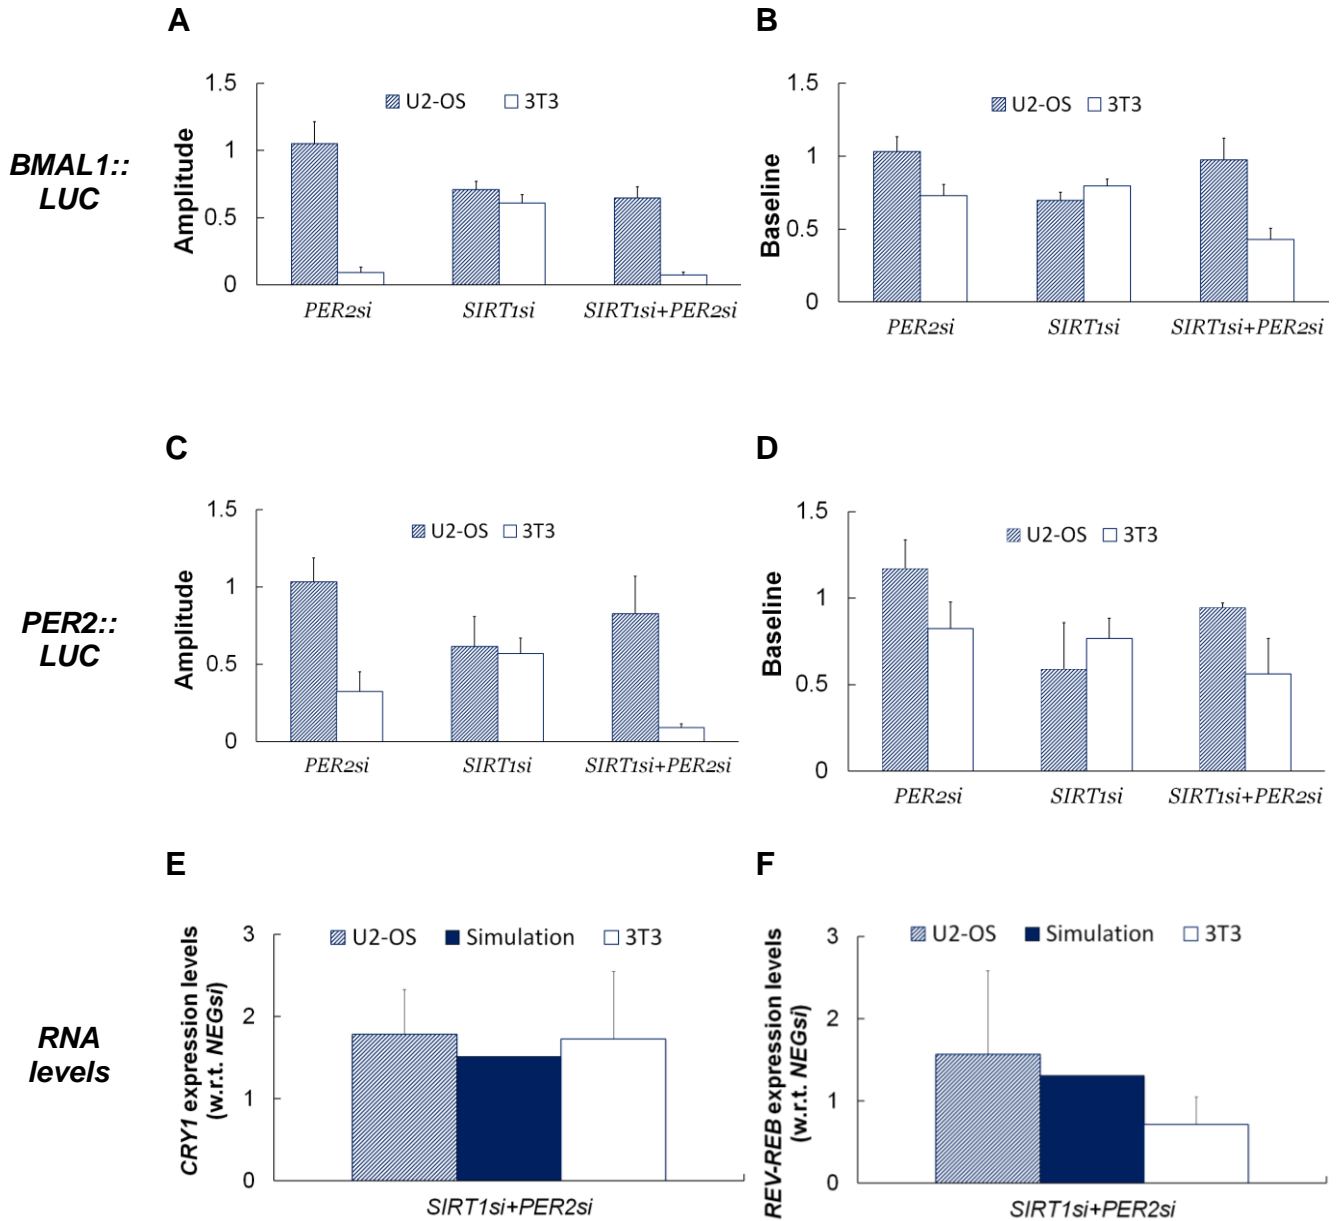

304 **Fig. S7. Related to Figure 5.** Circadian effect of *PER2* knockdown on *BMAL1* and *PER2* luciferase  
 305 oscillations in both human U2-OS and mouse NIH 3T3 cell lines. (A, B) Experimentally measured  
 306 amplitude and baseline of *BMAL1::LUC* oscillations from both U2-OS and 3T3 cells transfected with  
 307 siRNAs targeting *PER2* (*PER2si*), *SIRT1* (*SIRT1si*) or both (*SIRT1si+PER2si*). Note the naming  
 308 convention of U2-OS is used here for all data and simulation results. Amplitude and baseline of oscillations  
 309 are normalized with respect to *NEGsi*. (C, D) Circadian amplitude and baseline of *PER2::LUC* oscillations  
 310 measured under the same conditions as in (A, B). Comparison of model output and experimental RNA data  
 311 for *CRY1* (E) and *REV-ERB $\alpha$*  (F) under *SIRT1si+PER2si* condition. Expression (RNA) levels are  
 312 normalized with respect to control (*NEGsi*). Data are represented as mean  $\pm$  SD. Note that gene names are  
 313 represented in the uppercase italics naming convention (i.e. for genes of human origin) only for simplifying  
 314 this figure's representation.

315  
 316  
 317

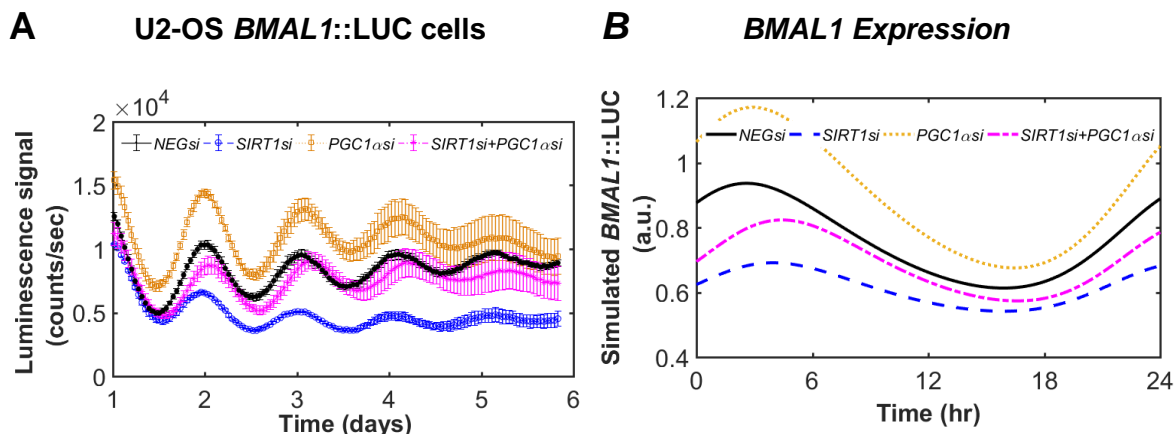

319 **Fig. S8. Related to Figure 5.** Circadian effect of *PGC1 $\alpha$*  knockdown on *BMAL1* luciferase oscillations in  
 320 human U2-OS cell line. **(A)** *SIRT1/PGC1 $\alpha$*  dual knockdown effects on oscillations of U2-OS *BMAL1*  
 321 reporter line. Data are represented as mean  $\pm$  SEM. **(B)** *In silico* reproduction of the circadian effects of  
 322 *SIRT1* and *PGC1 $\alpha$*  knockdown on U2-OS *BMAL1* expression. Simulations are performed under conditions  
 323 where *SIRT1* does not deacetylate *BMAL1* but deacetylates both *PER2* and *PGC1 $\alpha$* . The model predicts  
 324 the relevant *PGC1 $\alpha$*  knockdown under the assumption that *PGC1 $\alpha$ si* induces an increase (i.e. 2-fold) in the  
 325 active ROR complex association parameter ( $k_{a,RP}$  – Table S7). In the absence of this assumption, model  
 326 predictions are consistent with the experimental phenotype in 3T3 cells as shown in Figure's 5E and 5F.

327  
 328  
 329  
 330  
 331  
 332  
 333

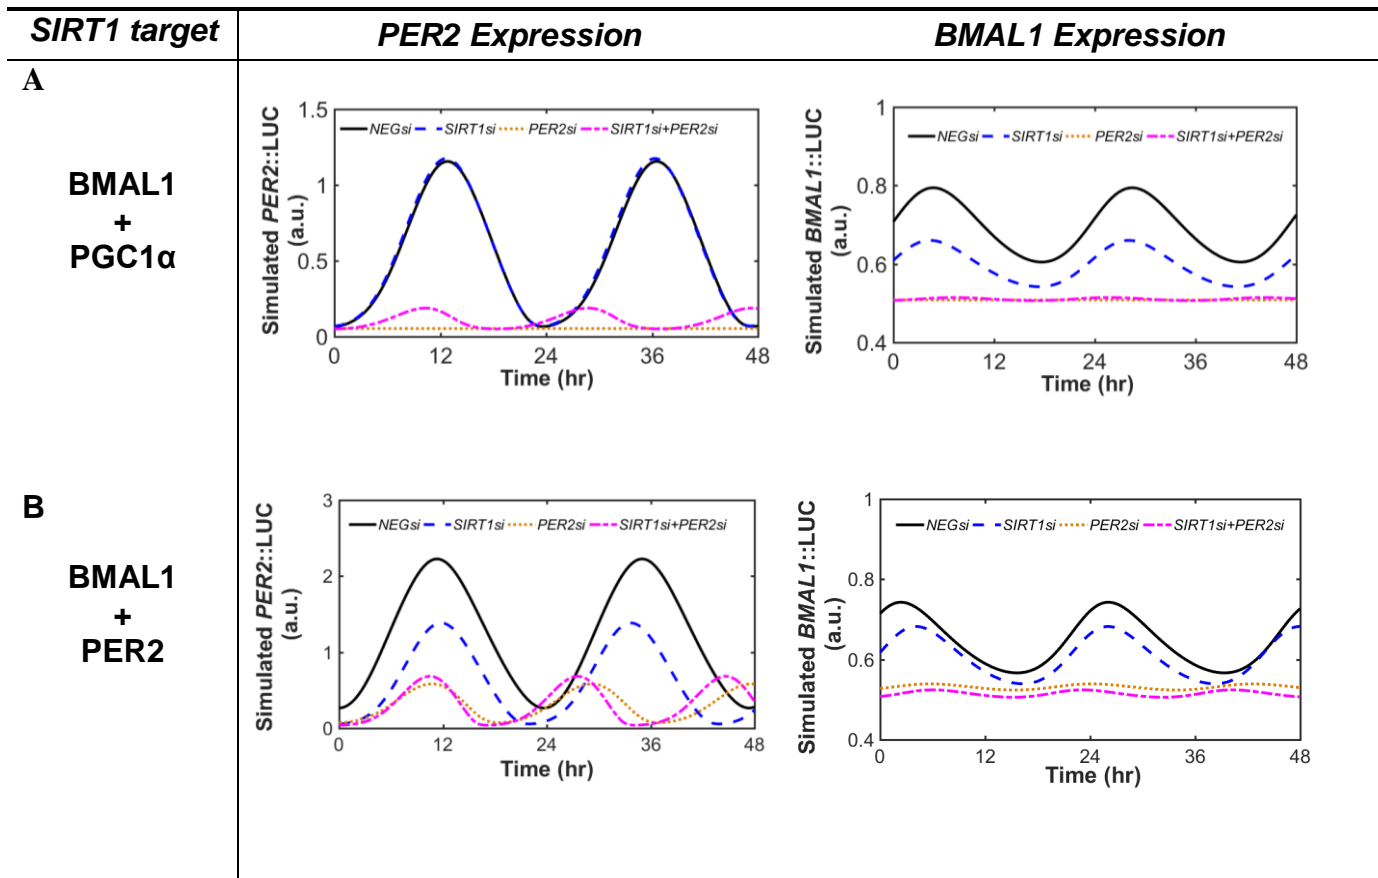

334 **Fig. S9. Related to Figure 6.** Simulation results of the circadian effects of *SIRT1* and *PER2* knockdown on  
 335 *BMAL1::LUC* and *PER2::LUC* oscillations. Simulations are performed when considering *SIRT1* regulates  
 336 (A) *BMAL1* and *PGC1 $\alpha$*  and (B) *BMAL1* and *PER2*.  
 337  
 338  
 339  
 340

341  
342  
343  
344

## Supplemental Tables

**Table S1: Estimated values of parameters involved in the SIRT1-dependent regulation of BMAL1 and PER2 (model A)<sup>§</sup>**

| Parameter            | Description of parameters                                                                                                        | Set H1 | Set H2 |
|----------------------|----------------------------------------------------------------------------------------------------------------------------------|--------|--------|
| $V_{0Per}$ (nM/hr)   | Basal transcriptional rates of <i>PER</i> , <i>CRY</i> and <i>NAMPT</i> expression                                               | 0.007  | 0.002  |
| $V_{0Cry}$ (nM/hr)   |                                                                                                                                  | 0.414  | 0.163  |
| $V_{0Nampt}$ (nM/hr) |                                                                                                                                  | 0.014  | 0.015  |
| $V_{sPer}$ (nM/hr)   | Maximum transcriptional rates of <i>PER</i> , <i>CRY</i> and <i>NAMPT</i> mRNA                                                   | 0.899  | 0.217  |
| $V_{sCry}$ (nM/hr)   |                                                                                                                                  | 0.443  | 0.131  |
| $V_{sNampt}$ (nM/hr) |                                                                                                                                  | 0.390  | 0.212  |
| $K_{APer}$ (nM)      | Michaelis constants for enhancement of <i>PER</i> , <i>CRY</i> and <i>NAMPT</i> expression by acetylated (active) BMAL1          | 1.864  | 0.713  |
| $K_{ACry}$ (nM)      |                                                                                                                                  | 0.934  | 0.581  |
| $K_{ANampt}$ (nM)    |                                                                                                                                  | 2.203  | 1.757  |
| $R_{Per}$ (nM)       | Michaelis constants for inhibition of <i>PER</i> , <i>CRY</i> and <i>NAMPT</i> expression by acetylated (active) PER-CRY complex | 0.921  | 0.059  |
| $R_{Cry}$ (nM)       |                                                                                                                                  | 1.148  | 0.044  |
| $R_{Nampt}$ (nM)     |                                                                                                                                  | 1.166  | 0.052  |
| a                    | Hill coefficients for activation (a) and repression (r) of ccgs by acetylated BMAL1 and PER-CRY respectively                     | 1      | 1      |
| r                    |                                                                                                                                  | 3      | 3      |
| $V_{dPer}$ (nM/hr)   | Maximum degradation rates of <i>PER</i> , <i>CRY</i> and <i>NAMPT</i> mRNA                                                       | 0.214  | 0.09   |
| $V_{dCry}$ (nM/hr)   |                                                                                                                                  | 0.452  | 0.024  |
| $V_{dNampt}$ (nM/hr) |                                                                                                                                  | 0.284  | 0.228  |
| $K_{dPer}$ (nM)      | Michaelis constants for degradation of <i>PER</i> , <i>CRY</i> and <i>NAMPT</i> mRNA                                             | 0.021  | 0.001  |
| $K_{dCry}$ (nM)      |                                                                                                                                  | 1.122  | 0.190  |
| $K_{dNampt}$ (nM)    |                                                                                                                                  | 0.569  | 1.937  |
| $k_{dn}$ (1/hr)      | Nonspecific degradation rate constant                                                                                            | 0.104  | 0.094  |
| $k_{sP}$ (1/hr)      | Synthesis rate constants of PER, CRY and NAMPT proteins                                                                          | 1.269  | 0.253  |
| $k_{sC}$ (1/hr)      |                                                                                                                                  | 0.448  | 0.201  |
| $k_{sN}$ (1/hr)      |                                                                                                                                  | 0.849  | 0.160  |
| $k_{a,PC}$ (1/hr)    | Association and dissociation rate constants for the formation of the cytosolic PER-CRY complex                                   | 0.037  | 0.192  |
| $k_{d,PC}$ (1/hr)    |                                                                                                                                  | 0.034  | 0.002  |
| $k_{im,PC}$ (1/hr)   | Rate constants for nuclear import of the cytosolic PER-CRY and BMAL1                                                             | 0.367  | 0.233  |
| $k_{im,B}$ (1/hr)    |                                                                                                                                  | 0.732  | 0.289  |
| $k_{ex,PC}$ (1/hr)   | Rate constants for exit of the nuclear proteins PER-CRY and BMAL1                                                                | 0.020  | 0.046  |
| $k_{ex,B}$ (1/hr)    |                                                                                                                                  | 1.117  | 0.738  |
| $V_{dPCC}$ (nM/hr)   | Maximum degradation rates for the cytosolic and nuclear PER-CRY complex                                                          | 0.068  | 0.033  |
| $V_{dPCN}$ (nM/hr)   |                                                                                                                                  | 0.039  | 0.183  |
| $K_{dPCC}$ (nM/hr)   | Michaelis constants for degradation of the cytosolic and nuclear PER-CRY complex                                                 | 1.252  | 0.082  |
| $K_{dPCN}$ (nM/hr)   |                                                                                                                                  | 1.024  | 0.196  |
| $V_{dP}$ (nM/hr)     | Maximum degradation rates for the cytosolic proteins PER, CRY and NAMPT                                                          | 0.493  | 4.8E-4 |
| $V_{dC}$ (nM/hr)     |                                                                                                                                  | 0.127  | 0.012  |
| $V_{dN}$ (nM/hr)     |                                                                                                                                  | 0.929  | 0.228  |
| $K_{dP}$ (nM)        | Michaelis constants for degradation of the cytosolic proteins PER, CRY and NAMPT                                                 | 1.551  | 0.019  |
| $K_{dC}$ (nM)        |                                                                                                                                  | 1.714  | 0.041  |
| $K_{dN}$ (nM)        |                                                                                                                                  | 1.549  | 2.052  |
| $k_{sB}$ (nM/hr)     | Synthesis rate for constitutive BMAL1 expression                                                                                 | 1.610  | 0.659  |
| $V_{dBC}$ (nM/hr)    | Maximum degradation rate for the cytosolic protein BMAL1                                                                         | 0.458  | 0.148  |
| $K_{dBC}$ (nM)       | Michaelis constant for degradation of the cytosolic protein BMAL1                                                                | 0.302  | 0.036  |
| $V_{dBN}$ (nM/hr)    | Maximum degradation rate for nuclear BMAL1                                                                                       | 0.207  | 0.015  |

|                           |                                                                           |       |       |
|---------------------------|---------------------------------------------------------------------------|-------|-------|
| $K_{\text{dBN}}$ (nM/hr)  | Michaelis constant for degradation of nuclear BMAL1                       | 1.838 | 1.788 |
| $v_{\text{PAC}}$ (nM/hr)  | Maximum acetylation rates for nuclear proteins PER-CRY and BMAL1          | 0.604 | 0.258 |
| $v_{\text{BAC}}$ (nM/hr)  |                                                                           | 0.997 | 0.293 |
| $v_{\text{PDAC}}$ (nM/hr) | Maximum deacetylation rates for nuclear PER-CRY and BMAL1                 | 0.121 | 0.248 |
| $v_{\text{BDAC}}$ (nM/hr) |                                                                           | 0.659 | 0.275 |
| $K_{\text{PAC}}$ (nM)     | Michaelis constants for protein acetylation of PER-CRY and BMAL1          | 0.145 | 0.028 |
| $K_{\text{BAC}}$ (nM)     |                                                                           | 3.488 | 0.169 |
| $K_{\text{PDAC}}$ (nM)    | Michaelis constants for protein deacetylation of PER-CRY and BMAL1 by NAD | 1.934 | 0.012 |
| $K_{\text{BDAC}}$ (nM)    |                                                                           | 3.221 | 0.035 |
| $s_n$ (nM/hr)             | Synthesis rate constant of cellular NAD levels                            | 0.524 | 0.126 |
| $v_{\text{dNAD}}$ (nM/hr) | Maximum degradation rate for intracellular NAD                            | 0.284 | 0.200 |
| $K_{\text{dNAD}}$ (nM)    | Michaelis constant for NAD degradation                                    | 1.530 | 1.150 |

345 <sup>s</sup>Rate parameters of sets H1 and H2 are scaled giving rise to wild type circadian oscillations  
346 (period ~23.7hr). While parameter set H1 reproduces the increased amplitude phenotype due to  
347 lack of *SIRT1* as shown by (4), parameter set H2 reproduces the reduced amplitude phenotype as  
348 reported by (13).

349  
350

351 **Table S2: Model parameters used to simulate siRNA experiments<sup>†</sup>**

| <i>siRNA</i>                     | Parameter symbol | Control value | <i>siRNA</i> value |
|----------------------------------|------------------|---------------|--------------------|
| <i>BMAL1si</i>                   | $k_{sB}$         | 1.073         | 0.429              |
|                                  | $V_{dPer2}$      | 0.302         | 0.423              |
| <i>PER2si</i>                    | $V_{dCry}$       | 0.285         | 0.214              |
|                                  | $V_{dREV}$       | 0.361         | 0.271              |
| <i>CLOCKsi</i>                   | $V_{BAC}$        | 0.317         | 0.152              |
|                                  | $V_{mRor}$       | 0.309         | 0.463              |
| <i>SIRT1si</i>                   | $S_n$            | 0.351         | 0.0187             |
| <i>PGC1<math>\alpha</math>si</i> | $V_{dpge}$       | 0.388         | 0.775              |

352 <sup>†</sup>Note the control values for all model parameters are summarized in **Table S7**.

353

354

355 **Table S3: siRNA and Primers used for QPCR (experimental section)**

| <i>siRNA used</i> | <i>Catalog#</i>   | <i>Company</i> | <i>Catalog#</i>        | <i>Company</i> |
|-------------------|-------------------|----------------|------------------------|----------------|
| <b>Gene</b>       | <b>Mouse</b>      |                | <b>Human</b>           |                |
| <i>BMAL1</i>      | Flexitube GS11865 | Mouse Qiagen   | see (15) for Sequence  |                |
| <i>CLOCK</i>      | Flexitube GS1275  | Mouse Qiagen   | see (15) for Sequence  |                |
| <i>RORA</i>       | Flexitube GS19883 | Mouse Qiagen   | see (15) for Sequence  |                |
| <i>RORB</i>       | Flexitube GS22599 | Mouse Qiagen   | see (15) for Sequence  |                |
| <i>RORC</i>       | Flexitube GS19885 | Mouse Qiagen   | see (15) for Sequence  |                |
| <i>PER2</i>       | Flexitube GS18627 | Mouse Qiagen   | Flexitube Human GS8864 | Qiagen         |
| <i>SIRT1</i>      | Flexitube GS93759 | Mouse Qiagen   | Flexitube GS23411      | Human Qiagen   |

356

| <b>Primers used for QPCR</b>   | <i>Catalog#</i>   | <i>Company</i>       | <i>Catalog#</i> | <i>Company</i>       |
|--------------------------------|-------------------|----------------------|-----------------|----------------------|
| <b>Gene</b>                    | <b>Mouse</b>      |                      | <b>Human</b>    |                      |
| <i>BMAL1</i>                   | Mm00500226_m1     | ABI/Lifetechnologies | Hs00154147_m1   | ABI/Lifetechnologies |
| <i>CLOCK</i>                   | Mm00455950_m1     | ABI/Lifetechnologies | Hs00231857_m1   | ABI/Lifetechnologies |
| <i>CRY1</i>                    | Mm00514392_m1     | ABI/Lifetechnologies | Hs00172734_m1   | ABI/Lifetechnologies |
| <i>CRY2</i>                    | Mm00546062_m1     | ABI/Lifetechnologies | Hs00323654_m1   | ABI/Lifetechnologies |
| <i>DBP</i>                     | Mm00497539_m1     | ABI/Lifetechnologies | Hs00609747_m1   | ABI/Lifetechnologies |
| <i>NR1D1</i>                   | Mm00520708_m1     | ABI/Lifetechnologies | Hs00253876_m1   | ABI/Lifetechnologies |
| <i>NR1D2</i>                   | Mm00441730_m1     | ABI/Lifetechnologies | Hs00233309_m1   | ABI/Lifetechnologies |
| <i>PER1</i>                    | Mm00561813_m1     | ABI/Lifetechnologies | Hs00242988_m1   | ABI/Lifetechnologies |
| <i>PER2</i>                    | Mm00478113_m1     | ABI/Lifetechnologies | Hs00256143_m1   | ABI/Lifetechnologies |
| <i>PGC1<math>\alpha</math></i> | Mm001208835_m1    | ABI/Lifetechnologies | Hs01016719_m1*  | ABI/Lifetechnologies |
| <i>RORA</i>                    | Mm.PT.58.32675621 | IDT                  | Hs00536545_m1   | ABI/Lifetechnologies |
| <i>RORB</i>                    | Mm.PT.58.9944191  | IDT                  | Hs00199445_m1   | ABI/Lifetechnologies |
| <i>RORC</i>                    | Mm.PT.58.8455991  | IDT                  | Hs01076112_m1   | ABI/Lifetechnologies |

357 Note that gene names are represented in the uppercase italics naming convention (i.e. for genes of human  
 358 origin) only for simplifying this table's representation.  
 359  
 360



361  
362

**Table S4: Data/phenotypes used for the development and validation of model A and model B**

| <i>Model A: Modeling the SIRT1-dependent regulation of BMAL1 and PER2</i>        |                                                                                                                                                                                                                                                                                                                                                                                                                                                                                                                                                                                                                                                 |
|----------------------------------------------------------------------------------|-------------------------------------------------------------------------------------------------------------------------------------------------------------------------------------------------------------------------------------------------------------------------------------------------------------------------------------------------------------------------------------------------------------------------------------------------------------------------------------------------------------------------------------------------------------------------------------------------------------------------------------------------|
| <b>Model development</b><br>(cost function)                                      | <p><b>PER-CRY negative feedback loop: essential for generating oscillations</b><br/>The transcriptional/translational PER-CRY loop gives rise to oscillations, while the metabolic feedback loop regulates the circadian amplitude</p>                                                                                                                                                                                                                                                                                                                                                                                                          |
|                                                                                  | <p><b>Phase optimization for mRNA of clock controlled genes (ccgs)</b><br/>Phases for mRNA of clock controlled genes (i.e., <i>PER</i>, <i>CRY</i>, <i>NAMPT</i>) are optimized including also the phases of metabolic signaling components (<i>NAMPT</i>, <i>NAD</i><sup>+</sup>)<br/><b>Amplitude optimization:</b> Although the model is mostly calibrated using phase data, relevant amplitudes for the <i>NAD</i> signaling components are considered but they are not weighted highly in the cost function</p>                                                                                                                            |
|                                                                                  | <p><b>Metabolic null mutation (i.e. <i>SIRT1</i><sup>-/-</sup>): Negligible period variance (±1h) while capturing significant amplitude sensitivity</b><br/>Under conditions of metabolic null mutation, the cost function is customized such that the amplitude of CCGs significantly varies with respect to WT by ±20%. The directionality of the amplitude (up- or down-regulation) is optimized based on the following experimental studies:<br/>(4): Increased circadian amplitude (<i>SIRT1</i><sup>-/-</sup>) (<i>parameter set H1</i>)<br/>(13): Reduced circadian amplitude (<i>SIRT1</i><sup>-/-</sup>) (<i>parameter set H2</i>)</p> |
|                                                                                  | <p><b>PER protein: rate-limiting component of PER-CRY negative limb</b><br/>As the rate-limiting factor, the protein PER dictates the rhythmic formation of PER-CRY repressor</p>                                                                                                                                                                                                                                                                                                                                                                                                                                                               |
| <b>Model validation</b><br>(literature data)                                     | <p><b>Predict phase relationships of CCGs and <i>NAD</i><sup>+</sup> signaling components</b><br/>We test if the simulated phase of PER protein (rate-limiting component of negative limb) is ~4-8h later vs. its respective mRNA dynamics<br/>Further, the predicted phase of acetylated <i>BMAL1</i> (not optimized) is compared with that of its regulator (<i>NAD</i>)</p>                                                                                                                                                                                                                                                                  |
|                                                                                  | <p><b><i>BMAL1</i><sup>-/-</sup>: Predict no oscillations &amp; reduced constitutive expression of ccgs</b><br/><i>BMAL1</i> is an essential clock component of the positive limb (activator) and therefore cell extracts deficient in <i>BMAL1</i> display arrhythmias while <i>NAMPT</i> or <i>NAD</i> levels are reduced compared to the WT</p>                                                                                                                                                                                                                                                                                              |
|                                                                                  | <p><b><i>CRY</i><sup>-/-</sup>: Predict no oscillations &amp; increased constitutive of ccgs</b><br/><i>CRY1/CRY2</i> are essential components (repressors) of the negative limb of the core clock machinery. Double KO of <i>CRY1/CRY2</i> accounts for loss of rhythmicity and increased <i>NAMPT</i> expression and/or <i>NAD</i> levels</p>                                                                                                                                                                                                                                                                                                 |
| <i>Model B: Modeling the SIRT1-dependent regulation of BMAL1, PER2 and PGC1α</i> |                                                                                                                                                                                                                                                                                                                                                                                                                                                                                                                                                                                                                                                 |
| <b>Model development</b><br>(cost function)                                      | <p><b>PER/CRY negative loop: essential for generating oscillations</b><br/>The transcriptional PER/CRY loop gives rise to sustained oscillations while the core clock continues to oscillate in the absence of <i>REVERB</i> or <i>ROR</i> genes<br/><b>REV-ERB negative loop: not essential for oscillations but crucial for <i>Bmal1</i> rhythmicity</b></p>                                                                                                                                                                                                                                                                                  |
|                                                                                  | <p><b>Phase optimization</b><br/>The phases for mRNA of clock genes (i.e. <i>PER</i>, <i>CRY</i>, <i>NAMPT</i>) are optimized including also the phases of <i>NAMPT</i> protein and <i>NAD</i> metabolite. While the phase difference between <i>REV-ERB</i> and <i>ROR</i> mRNA is not optimized, the anti-phase relationship between <i>BMAL1</i> and <i>PER</i> mRNA is considered in the cost function<br/><b>Amplitude optimization:</b> Although the model is mostly calibrated using phase data,</p>                                                                                                                                     |

363

|                                                    |                                                                                                                                                                                                                                                                                                                                                                                                                                                                                                                                                                                                                                                                                                                                                                                                                                                                                                                                                                                                               |
|----------------------------------------------------|---------------------------------------------------------------------------------------------------------------------------------------------------------------------------------------------------------------------------------------------------------------------------------------------------------------------------------------------------------------------------------------------------------------------------------------------------------------------------------------------------------------------------------------------------------------------------------------------------------------------------------------------------------------------------------------------------------------------------------------------------------------------------------------------------------------------------------------------------------------------------------------------------------------------------------------------------------------------------------------------------------------|
|                                                    | <p>relevant amplitudes for the metabolic NAD loop and ROR/REVERB module are considered but they are not weighted highly in the cost function</p> <hr/> <p><b>Metabolic null mutation (i.e. <i>SIRT1</i><sup>-/-</sup>): Reduced baseline/amplitude for RORE genes</b><br/> In the absence of <i>SIRT1</i> expression, the cost function is customized such that the mRNA baseline of RORE genes (i.e. <i>ROR</i> and <i>BMALI</i>) are significantly reduced when compared to WT</p> <p><b>Loss-of-function mutation for <i>BMALI</i> using RNAi experiment (Bmal1si): Increased baseline of <i>BMALI</i> promoter but reduced amplitude</b><br/> Given the opposing activities of ROR and REV-ERB proteins at the <i>BMALI</i> promoter, model parameters are set to consider REV-ERB as the dominant force within the ROR/REV-ERB loop. This in turn allows the model to capture the increased baseline of <i>BMALI</i> expression in the Bmal1si mutant due to reduction in <i>REV-ERB</i> expression.</p> |
| <b>Model validation</b><br>(main RNAi experiments) | <p><b>Loss-of-function mutation for <i>SIRT1</i> and <i>BMALI</i> (Sirt1+Bmal1si)</b><br/> <i>SIRT1</i> knockdown lowers baseline and amplitude of circadian gene expression when <i>BMALI</i> is also knocked down</p> <hr/> <p><b>Loss-of-function mutation for <i>CLOCK</i> (Clocksi)</b><br/> <i>CLOCK</i> knockdown increases the baseline of <i>BMALI</i> mRNA but lowers the amplitude similar to the Bmal1si mutant</p> <p><b>Loss-of-function mutation for <i>SIRT1</i> and <i>CLOCK</i> (Sirt1si+Clocksi)</b><br/> Similar responses to Bmal1si+Sirt1si</p> <p><b>Loss-of-function mutation for <i>SIRT1</i> and <i>PER2</i> (Sirt1si+Per2si)</b><br/> The dual knockdown of <i>PER2</i> and <i>SIRT1</i> compromises the amplitude of <i>PER2</i> promoter gene expression.</p>                                                                                                                                                                                                                    |

364  
365  
366  
367

368 **Table S5: Experimental and simulated phases<sup>†</sup>**

| Model components            | Experimental phase, hr<br>(peak expression) | Simulated phase,<br>hr<br>(set H1) | Simulated phase,<br>hr<br>(set H2) |
|-----------------------------|---------------------------------------------|------------------------------------|------------------------------------|
| <i>PER</i> expression       | Per1: [10-16]<br>Per2: [14-18]              | ~14                                | ~14                                |
| <i>CRY</i> expression       | Cry1: [14-18]<br>Cry2: [8-12]               | ~14                                | ~14                                |
| <i>NAMPT</i> expression     | ~14                                         | ~13                                | ~13                                |
| NAMPT (protein)             | [14-22]                                     | ~15                                | ~17                                |
| NAD <sup>+</sup> (cofactor) | [14-22]                                     | ~18                                | ~20                                |

369 <sup>†</sup>Experimental phases are compiled from literature evidence (6, 4, 16-20,) using peripheral  
370 (metabolically active) tissues including data derived from liver. The experimental phase  
371 range for *PER* and *CRY* mRNA is derived from the studies (6, 18-20) and it is defined as  
372 the average circadian time (CT) at peak expression. For example, *PER* mRNA levels peak  
373 on average at CT13 and fall at CT0 during the beginning of the subjective day (18).  
374 According to the study (16) the gene transcript of *NAMPT* also peaks early in the evening  
375 (approximately at CT14) while its protein (NAMPT) peaks later together with the circadian  
376 NAD<sup>+</sup> levels which are in phase with the rhythmic SIRT1 activity.

377  
378

Table S6: Averaged U2-OS and 3T3 QPCR data for all knockdowns<sup>†</sup>

|                                       |      | U2-OS                                      | 3T3   | U2-OS                                              | 3T3   |
|---------------------------------------|------|--------------------------------------------|-------|----------------------------------------------------|-------|
| <b><i>BMAL1</i></b>                   |      | <b><i>BMAL1si</i></b>                      |       | <b><i>SIRT1si+BMAL1si</i></b>                      |       |
|                                       | Mean | 0.403                                      | 0.521 | 0.420                                              | 0.483 |
|                                       | SD   | 0.169                                      | 0.137 | 0.141                                              | 0.102 |
|                                       | N    | 11                                         | 8     | 10                                                 | 8     |
| <b><i>SIRT1</i></b>                   | Mean |                                            |       | 0.195                                              | 0.206 |
|                                       | SD   |                                            |       | 0.063                                              | 0.046 |
|                                       | N    |                                            |       | 13                                                 | 12    |
| <b><i>CLOCK</i></b>                   |      | <b><i>CLOCKsi</i></b>                      |       | <b><i>SIRT1si+CLOCKsi</i></b>                      |       |
|                                       | Mean | 0.481                                      | 0.261 | 0.262                                              | 0.232 |
|                                       | SD   | 0.340                                      | 0.094 | 0.096                                              | 0.08  |
|                                       | N    | 10                                         | 8     | 10                                                 | 8     |
| <b><i>SIRT1</i></b>                   | Mean |                                            |       | 0.163                                              | 0.182 |
|                                       | SD   |                                            |       | 0.042                                              | 0.06  |
|                                       | N    |                                            |       | 10                                                 | 8     |
| <b><i>PER2</i></b>                    |      | <b><i>PER2si</i></b>                       |       | <b><i>SIRT1si+PER2si</i></b>                       |       |
|                                       | Mean | 0.437                                      | 0.466 | 0.336                                              | 0.290 |
|                                       | SD   | 0.224                                      | 0.167 | 0.119                                              | 0.153 |
|                                       | N    | 9                                          | 8     | 9                                                  | 8     |
| <b><i>SIRT1</i></b>                   | Mean |                                            |       | 0.186                                              | 0.215 |
|                                       | SD   |                                            |       | 0.058                                              | 0.077 |
|                                       | N    |                                            |       | 9                                                  | 8     |
| <b><i>PGC1<math>\alpha</math></i></b> |      | <b><i>PGC1asi</i></b>                      |       | <b><i>SIRT1si+PGC1asi</i></b>                      |       |
|                                       | Mean | 0.440                                      | 0.226 | 0.518                                              | 0.302 |
|                                       | SD   | 0.190                                      | 0.092 | 0.272                                              | 0.087 |
|                                       | n    | 6                                          | 8     | 4                                                  | 7     |
| <b><i>SIRT1</i></b>                   | Mean |                                            |       | 0.518                                              | 0.302 |
|                                       | SD   |                                            |       | 0.272                                              | 0.087 |
|                                       | N    |                                            |       | 4                                                  | 7     |
| <b><i>ROR<math>\alpha</math></i></b>  |      | <b><i>ROR(<math>\alpha</math>-c)si</i></b> |       | <b><i>SIRT1si+ROR(<math>\alpha</math>-c)si</i></b> |       |
|                                       | Mean | 0.756                                      | 0.131 | 1.267                                              | 0.192 |
|                                       | SD   | 0.734                                      | 0.025 | 1.501                                              | 0.161 |
|                                       | n    | 6                                          | 9     | 6                                                  | 9     |
| <b><i>ROR<math>\beta</math></i></b>   | Mean | 0.272                                      | U.D.  | 1.842                                              | U.D.  |
|                                       | SD   | 0.160                                      | U.D.  | 2.295                                              | U.D.  |
|                                       | N    | 5                                          | >3    | 6                                                  | >3    |
| <b><i>ROR<math>\gamma</math></i></b>  | Mean | 0.272                                      | U.D.  | 0.296                                              | U.D.  |
|                                       | SD   | 0.156                                      | U.D.  | 0.197                                              | U.D.  |
|                                       | N    | 4                                          | >3    | 5                                                  | >3    |
| <b><i>SIRT1</i></b>                   |      |                                            |       | 0.191                                              | 0.175 |
|                                       |      |                                            |       | 0.043                                              | 0.046 |
|                                       |      |                                            |       | 7                                                  | 9     |
| <b><i>SIRT1</i></b>                   |      | <b><i>SIRT1si</i></b>                      |       |                                                    |       |
|                                       | Mean | 0.195                                      | 0.206 |                                                    |       |
|                                       | SD   | 0.063                                      | 0.046 |                                                    |       |
|                                       | N    | 13                                         | 12    |                                                    |       |

380 †All gene expressions are fold change over control cells treated with scrambled siRNA. SD =  
381 Standard deviation. U.D = Undetermined. Note that gene names are represented in the uppercase  
382 italics naming convention (i.e. for genes of human origin) only for simplifying this table's  
383 representation.  
384  
385

386  
387

**Table S7: Estimated values of parameters involved in the development of the extended circadian model (model B)**

| Parameter               | Description of parameters                                                                                                                                                      | Value                                                                                                                                                                                                                                                                                                         |
|-------------------------|--------------------------------------------------------------------------------------------------------------------------------------------------------------------------------|---------------------------------------------------------------------------------------------------------------------------------------------------------------------------------------------------------------------------------------------------------------------------------------------------------------|
| $V_{0Per(1/2)}$ (nM/hr) |                                                                                                                                                                                | 0.026                                                                                                                                                                                                                                                                                                         |
| $V_{0Cry}$ (nM/hr)      |                                                                                                                                                                                | 0.270                                                                                                                                                                                                                                                                                                         |
| $V_{0Nampt}$ (nM/hr)    | Basal transcriptional rates of <i>PER(1/2)</i> , <i>CRY</i> , <i>NAMPT</i> , <i>REVERB</i> , <i>ROR</i> and <i>BMAL1</i> expression                                            | 0.251                                                                                                                                                                                                                                                                                                         |
| $V_{0Rev}$ (nM/hr)      |                                                                                                                                                                                | 0.040                                                                                                                                                                                                                                                                                                         |
| $V_{0Ror}$ (nM/hr)      |                                                                                                                                                                                | 0.178                                                                                                                                                                                                                                                                                                         |
| $V_{0B}$ (nM/hr)        |                                                                                                                                                                                | 0.405                                                                                                                                                                                                                                                                                                         |
| $V_{sPer(1/2)}$ (nM/hr) |                                                                                                                                                                                | 1.144                                                                                                                                                                                                                                                                                                         |
| $V_{sCry}$ (nM/hr)      |                                                                                                                                                                                | 0.072                                                                                                                                                                                                                                                                                                         |
| $V_{sNampt}$ (nM/hr)    | Maximum transcriptional rates of <i>PER(1/2)</i> , <i>CRY</i> , <i>NAMPT</i> , <i>REVERB</i> , <i>ROR</i> and <i>BMAL1</i> expression                                          | 1.485                                                                                                                                                                                                                                                                                                         |
| $V_{sRev}$ (nM/hr)      |                                                                                                                                                                                | 0.901                                                                                                                                                                                                                                                                                                         |
| $V_{s1Ror}$ (nM/hr)     |                                                                                                                                                                                | 0.744                                                                                                                                                                                                                                                                                                         |
| $V_{s2Ror}$ (nM/hr)     |                                                                                                                                                                                | 0.052                                                                                                                                                                                                                                                                                                         |
| $V_{sB}$ (nM/hr)        |                                                                                                                                                                                | 0.417                                                                                                                                                                                                                                                                                                         |
| $K_{APer(1/2)}$ (nM)    |                                                                                                                                                                                | 1.150                                                                                                                                                                                                                                                                                                         |
| $K_{ACry}$ (nM)         | Michaelis constants for enhancement of <i>PER(1/2)</i> , <i>CRY</i> , <i>NAMPT</i> , <i>REVERB</i> and <i>ROR</i> expression by acetylated (active) <i>BMAL1</i>               | 0.291                                                                                                                                                                                                                                                                                                         |
| $K_{ANampt}$ (nM)       |                                                                                                                                                                                | 1.844                                                                                                                                                                                                                                                                                                         |
| $K_{ARev}$ (nM)         |                                                                                                                                                                                | 4.755                                                                                                                                                                                                                                                                                                         |
| $K_{A1Ror}$ (nM)        |                                                                                                                                                                                | 2.483                                                                                                                                                                                                                                                                                                         |
| $R_{Per(1/2)}$ (nM)     |                                                                                                                                                                                | Michaelis constants for inhibition of <i>PER(1/2)</i> , <i>CRY</i> , <i>NAMPT</i> , <i>REVERB</i> Michaelis constants for inhibition of <i>PER(1/2)</i> , <i>CRY</i> , <i>NAMPT</i> , <i>REVERB</i> and <i>ROR</i> expression by <i>PER1-CRY</i> complex and <i>ROR</i> expression by <i>PER1-CRY</i> complex |
| $R_{Cry}$ (nM)          | 0.675                                                                                                                                                                          |                                                                                                                                                                                                                                                                                                               |
| $R_{Nampt}$ (nM)        | 1.074                                                                                                                                                                          |                                                                                                                                                                                                                                                                                                               |
| $R_{Rev}$ (nM)          | 1.506                                                                                                                                                                          |                                                                                                                                                                                                                                                                                                               |
| $R_{1Ror}$ (nM)         | 0.970                                                                                                                                                                          |                                                                                                                                                                                                                                                                                                               |
| $R_{Per(1/2)}$ (nM)     |                                                                                                                                                                                | 0.160                                                                                                                                                                                                                                                                                                         |
| $R_{Cry}$ (nM)          | Michaelis constants for inhibition of <i>PER(1/2)</i> , <i>CRY</i> , <i>NAMPT</i> , <i>REVERB</i> and <i>ROR</i> expression by acetylated <i>PER2<sup>AC</sup>-CRY</i> complex | 0.112                                                                                                                                                                                                                                                                                                         |
| $R_{Nampt}$ (nM)        |                                                                                                                                                                                | 0.179                                                                                                                                                                                                                                                                                                         |
| $R_{Rev}$               |                                                                                                                                                                                | 0.251                                                                                                                                                                                                                                                                                                         |
| $R_{1Ror}$              |                                                                                                                                                                                | 0.162                                                                                                                                                                                                                                                                                                         |
| $K_{AB}$ (nM)           |                                                                                                                                                                                | Michaelis constants for enhancement of <i>BMAL1</i> and <i>ROR</i> expression by active <i>ROR</i> *                                                                                                                                                                                                          |
| $K_{A2Ror}$ (nM)        | 7.244                                                                                                                                                                          |                                                                                                                                                                                                                                                                                                               |
| $R_B$                   | Michaelis constants for inhibition of <i>BMAL1</i> and <i>ROR</i> expression by <i>REV-ERB</i>                                                                                 | 0.0159                                                                                                                                                                                                                                                                                                        |
| $R_{2Ror}$              |                                                                                                                                                                                | 2.55                                                                                                                                                                                                                                                                                                          |
| a                       | Hill coefficients for activation (a) and repression (r) of ccgs by acetylated <i>BMAL1</i> and <i>PER-CRY</i> respectively                                                     | 2                                                                                                                                                                                                                                                                                                             |
| r                       |                                                                                                                                                                                | 4                                                                                                                                                                                                                                                                                                             |
| b                       | Hill coefficients for activation (b) and repression (c) of <i>RORE</i> by active <i>ROR</i> * and <i>REV-ERB</i> respectively                                                  | 2                                                                                                                                                                                                                                                                                                             |
| c                       |                                                                                                                                                                                | 3                                                                                                                                                                                                                                                                                                             |
| $V_{dPer(1/2)}$ (nM/hr) |                                                                                                                                                                                | 0.302                                                                                                                                                                                                                                                                                                         |
| $V_{dCry}$ (nM/hr)      |                                                                                                                                                                                | 0.285                                                                                                                                                                                                                                                                                                         |
| $V_{dNampt}$ (nM/hr)    | Maximum degradation rates of <i>PER(1/2)</i> , <i>CRY</i> , <i>NAMPT</i> , <i>REVERB</i> , <i>ROR</i> and <i>BMAL1</i> expression                                              | 0.594                                                                                                                                                                                                                                                                                                         |
| $V_{dRev}$ (nM/hr)      |                                                                                                                                                                                | 0.361                                                                                                                                                                                                                                                                                                         |
| $V_{dRor}$ (nM/hr)      |                                                                                                                                                                                | 0.309                                                                                                                                                                                                                                                                                                         |
| $V_{dB}$ (nM/hr)        |                                                                                                                                                                                | 0.473                                                                                                                                                                                                                                                                                                         |
| $K_{dPer(1/2)}$ (nM)    |                                                                                                                                                                                |                                                                                                                                                                                                                                                                                                               |
| $K_{dCry}$ (nM)         | Michaelis constants for degradation of <i>PER(1/2)</i> , <i>CRY</i>                                                                                                            | 0.371                                                                                                                                                                                                                                                                                                         |
| $K_{dNampt}$ (nM)       |                                                                                                                                                                                | 0.99                                                                                                                                                                                                                                                                                                          |
| $K_{dRev}$ (nM)         | Michaelis constants for degradation of <i>NAMPT</i> , <i>REVERB</i> , <i>ROR</i>                                                                                               | 0.691                                                                                                                                                                                                                                                                                                         |

|                    |                                                                                                  |                                                                     |
|--------------------|--------------------------------------------------------------------------------------------------|---------------------------------------------------------------------|
| $K_{dRor}$ (nM)    | and <i>BMAL1</i> mRNA                                                                            | 3.659                                                               |
| $K_{dB}$ (nM)      |                                                                                                  | 0.135                                                               |
| $k_{dn}$ (1/hr)    | Nonspecific degradation rate constant                                                            | 0.077                                                               |
| $k_{sP1}$ (1/hr)   |                                                                                                  | 1.009                                                               |
| $k_{sP2}$ (1/hr)   |                                                                                                  | 0.727                                                               |
| $k_{sC}$ (1/hr)    | Synthesis rate constants of PER(1/2), CRY, NAMPT, REV-ERB, ROR and BMAL1 proteins                | 1.407                                                               |
| $k_{sN}$ (1/hr)    |                                                                                                  | 1.295                                                               |
| $k_{sREV}$ (1/hr)  |                                                                                                  | 0.167                                                               |
| $k_{sROR}$ (1/hr)  |                                                                                                  | 0.320                                                               |
| $k_{sB}$ (1/hr)    |                                                                                                  | 1.073                                                               |
| $k_{a,P1C}$ (1/hr) |                                                                                                  | 0.006                                                               |
| $k_{d,P1C}$ (1/hr) | Association and dissociation rate constants for the formation of PER1-CRY and PER2-CRY complex   | 0.006                                                               |
| $k_{a,P2C}$ (1/hr) |                                                                                                  | 0.088                                                               |
| $k_{d,P2C}$ (1/hr) |                                                                                                  | 0.192                                                               |
| $k_{im,B}$ (1/hr)  |                                                                                                  | Rate constants for nuclear import and export of the cytosolic BMAL1 |
| $k_{ex,B}$ (1/hr)  | 0.617                                                                                            |                                                                     |
| $V_{dP1C}$ (nM/hr) | Maximum degradation rates for PER1-CRY and PER2-CRY complexes                                    | 0.069                                                               |
| $V_{dP2C}$ (nM/hr) |                                                                                                  | 0.243                                                               |
| $K_{dP1C}$ (nM/hr) | Michaelis constants for degradation of PER1-CRY and PER2-CRY complexes                           | 0.575                                                               |
| $K_{dP2C}$ (nM/hr) |                                                                                                  | 0.575                                                               |
| $V_{dP1}$ (nM/hr)  |                                                                                                  | 1.285                                                               |
| $V_{dP2}$ (nM/hr)  |                                                                                                  | 0.698                                                               |
| $V_{dC}$ (nM/hr)   | Maximum degradation rates for the proteins PER(1/2), CRY, NAMPT, REV-ERB, ROR and BMAL1          | 0.265                                                               |
| $V_{dN}$ (nM/hr)   |                                                                                                  | 1.211                                                               |
| $V_{dREV}$ (nM/hr) |                                                                                                  | 0.387                                                               |
| $V_{dROR}$ (nM/hr) |                                                                                                  | 0.179                                                               |
| $V_{dBc}$ (nM/hr)  |                                                                                                  | 0.104                                                               |
| $K_{dP}$ (nM)      |                                                                                                  | 0.478                                                               |
| $K_{dC}$ (nM)      |                                                                                                  | 1.247                                                               |
| $K_{dN}$ (nM)      | Michaelis constants for degradation of the proteins PER(1/2), CRY, NAMPT, REV-ERB, ROR and BMAL1 | 0.917                                                               |
| $K_{dREV}$ (nM)    |                                                                                                  | 0.796                                                               |
| $K_{dROR}$ (nM)    |                                                                                                  | 4.893                                                               |
| $K_{dBc}$ (nM)     |                                                                                                  | 0.135                                                               |
| $V_{dBN}$ (nM/hr)  |                                                                                                  | Maximum degradation rate for nuclear BMAL1                          |
| $K_{dBN}$ (nM/hr)  | Michaelis constant for degradation of nuclear BMAL1                                              | 3.392                                                               |
| $V_{PAC}$ (nM/hr)  |                                                                                                  | 0.254                                                               |
| $V_{BAC}$ (nM/hr)  | Maximum acetylation rates for proteins PER2-CRY and BMAL1                                        | 0.318                                                               |
| $V_{PDAC}$ (nM/hr) | Maximum deacetylation rates for PER2-CRY and BMAL1                                               | 0.233                                                               |
| $V_{BDAC}$ (nM/hr) |                                                                                                  | 0.0024                                                              |
| $K_{PAC}$ (nM)     | Michaelis constants for protein acetylation of PER2-CRY and BMAL1                                | 8.149                                                               |
| $K_{BAC}$ (nM)     |                                                                                                  | 0.497                                                               |
| $K_{PDAC}$ (nM)    | Michaelis constants for protein deacetylation of PER2-CRY and BMAL1 by NAD                       | 4.998                                                               |
| $K_{BDAC}$ (nM)    |                                                                                                  | 4.016                                                               |
| $s_n$ (nM/hr)      | Synthesis rate constant of cellular NAD levels                                                   | 0.351                                                               |
| $V_{dNAD}$ (nM/hr) | Maximum degradation rate for intracellular NAD                                                   | 0.881                                                               |
| $K_{dNAD}$ (nM)    | Michaelis constant for NAD degradation                                                           | 1.650                                                               |
| $V_{0pgc}$ (nM)    | Basal activation rate of PGC1 $\alpha$                                                           | 0.046                                                               |

|                   |                                                                  |        |
|-------------------|------------------------------------------------------------------|--------|
| $v_{spgc}$ (nM)   | Maximum activation rate by NAD                                   | 0.0142 |
| $K_{Apgc}$ (nM)   | Michaelis activation constant for PGC1 $\alpha$                  | 7.578  |
| $v_{dpgc}$ (nM)   | Maximum degradation rate for PGC1 $\alpha$ activity              | 0.388  |
| $K_{dpgc}$ (nM)   | Michaelis constant for degradation of active PGC1 $\alpha$       | 3.299  |
| $k_{a,RP}$ (1/hr) | Association and dissociation rate constants for the formation of | 0.621  |
| $k_{d,RP}$ (1/hr) | active ROR* complex                                              | 0.329  |

388

389



390 **References**

- 391 1. Price TS, Baggs JE, Curtis AM, Fitzgerald GA, & Hogenesch JB (2008) WAVECLOCK:  
392 wavelet analysis of circadian oscillation. *Bioinformatics* 24(23):2794-2795.
- 393 2. Yamamoto Y, Yagita K, & Okamura H (2005) Role of cyclic mPer2 expression in the  
394 mammalian cellular clock. *Mol Cell Biol* 25(5):1912-1921.
- 395 3. Liu AC, et al. (2008) Redundant function of REV-ERBalpha and beta and non-essential  
396 role for Bmal1 cycling in transcriptional regulation of intracellular circadian rhythms.  
397 *PLoS Genet* 4(2):e1000023.
- 398 4. Nakahata Y, et al. (2008) The NAD<sup>+</sup>-dependent deacetylase SIRT1 modulates CLOCK-  
399 mediated chromatin remodeling and circadian control. *Cell* 134(2):329-340.
- 400 5. Yagita K, Tamanini F, van Der Horst GT, & Okamura H (2001) Molecular mechanisms of  
401 the biological clock in cultured fibroblasts. *Science* 292(5515):278-281.
- 402 6. Lee C, Etchegaray JP, Cagampang FRA, Loudon ASI, & Reppert SM (2001)  
403 Posttranslational mechanisms regulate the mammalian circadian clock. *Cell* 107(7):855-  
404 867.
- 405 7. Bellet MM & Sassone-Corsi P (2010) Mammalian circadian clock and metabolism - the  
406 epigenetic link. *J Cell Sci* 123(Pt 22):3837-3848.
- 407 8. Becker-Weimann S, Wolf J, Herzog H, & Kramer A (2004) Modeling feedback loops of  
408 the mammalian circadian oscillator. *Biophys J* 87(5):3023-3034.
- 409 9. Ueda HR, Hagiwara M, & Kitano H (2001) Robust oscillations within the interlocked  
410 feedback model of *Drosophila* circadian rhythm. *J Theor Biol* 210(4):401-406.
- 411 10. Bernard S, Gonze D, Cajavec B, Herzog H, & Kramer A (2007) Synchronization-induced  
412 rhythmicity of circadian oscillators in the suprachiasmatic nucleus. *PLoS Comput Biol*  
413 3(4):e68.
- 414 11. Chen R, et al. (2009) Rhythmic PER abundance defines a critical nodal point for negative  
415 feedback within the circadian clock mechanism. *Mol Cell* 36(3):417-430.
- 416 12. D'Alessandro M, et al. (2015) A tunable artificial circadian clock in clock-defective mice.  
417 *Nat Commun* 6:8587.
- 418 13. Asher G, et al. (2008) SIRT1 regulates circadian clock gene expression through PER2  
419 deacetylation. *Cell* 134(2):317-328.
- 420 14. Liu C, Li S, Liu T, Borjigin J, & Lin JD (2007) Transcriptional coactivator PGC-1alpha  
421 integrates the mammalian clock and energy metabolism. *Nature* 447(7143):477-481.
- 422 15. Baggs JE, et al. (2009) Network features of the mammalian circadian clock. *PLoS Biol*  
423 7(3):e52.
- 424 16. Ramsey KM, et al. (2009) Circadian Clock Feedback Cycle Through NAMPT-Mediated  
425 NAD(+) Biosynthesis. *Science* 324(5927):651-654.
- 426 17. Naimi M, Arous C, & Van Obberghen E (2010) Energetic cell sensors: a key to metabolic  
427 homeostasis. *Trends Endocrinol Metab* 21(2):75-82.
- 428 18. Yamamoto T, et al. (2004) Transcriptional oscillation of canonical clock genes in mouse  
429 peripheral tissues. *BMC Mol Biol* 5:18.
- 430 19. Ueda HR, et al. (2002) A transcription factor response element for gene expression during  
431 circadian night. *Nature* 418(6897):534-539.
- 432 20. Ripperger JA, Jud C, & Albrecht U (2011) The daily rhythm of mice. *FEBS Lett*  
433 585(10):1384-1392
- 434 21. Gutenkunst RN, et al. (2007) Universally sloppy parameter sensitivities in systems  
435 biology models. *PLoS Comput Biol* 3(10):1871-1878.
- 436 22. Belden WJ & Dunlap JC (2008) SIRT1 is a circadian deacetylase for core clock  
437 components. *Cell* 134(2):212-214.
- 438 23. Fuller PM, Lu J, & Saper CB (2008) Differential rescue of light- and food-entrainable  
439 circadian rhythms. *Science* 320(5879):1074-1077.
